## Selection and demography shape genomic variation in a ‘Sky Island’ species

Tom Hill<sup>1\*</sup>, Robert L. Unckless<sup>1</sup>

1. 4055 Haworth Hall, The Department of Molecular Biosciences, University of Kansas, 1200 Sunnyside Avenue, Lawrence, KS 66045. Email: [tom.hill@ku.edu](mailto:tom.hill@ku.edu)

\* Corresponding author

Keywords: *Drosophila innubila*, local adaptation, phylogeography, inversions

## 1 **Abstract**

2 Over time, populations of species can expand, contract, and become isolated, creating subpopulations that  
3 can adapt to local conditions. Understanding how species adapt following these changes is of great interest,  
4 especially as the current climate crisis has caused range shifts for many species. Here, we characterize how  
5 *Drosophila innubila* came to inhabit and adapt to its current range: mountain forests in southwestern USA  
6 separated by large expanses of desert. Using population genomic data from more than 300 wild-caught  
7 individuals, we examine four distinct populations to determine their population history in these mountain-  
8 forests, looking for signatures of local adaptation to establish a genomic model for this spatially-distributed  
9 system with a well understood ecology. We find *D. innubila* spread northwards during the previous  
10 glaciation period (30-100 KYA), and has recently expanded even further (0.2-2 KYA). Surprisingly, *D.*  
11 *innubila* shows little evidence of population structure, though consistent with a recent migration, we find  
12 signatures of a population contraction following this migration, and signatures of recent local adaptation  
13 and selective sweeps in cuticle development and antifungal immunity. However, we find little support for  
14 recurrent selection in these genes suggesting recent local adaptation. In contrast, we find evidence of  
15 recurrent positive selection in the Toll-signaling system and the Toll-regulated antimicrobial peptides.

## 16 **Introduction**

17 In the past 25,000 years, the earth has undergone substantial environmental changes due to both human-  
18 mediated events (anthropogenic environment destruction, desert expansion, extreme weather and the  
19 growing anthropogenic climate crisis) (CLOUDSLEY-THOMPSON 1978; ROSENZWEIG *et al.* 2008) and  
20 events unrelated to humans (glaciation and tectonic shifts) (HEWITT 2000; HOLMGREN *et al.* 2003; SURVEY  
21 2005). These environmental shifts can fundamentally reorganize habitats, influence organism fitness, rates  
22 of migration between locations, and population ranges (SMITH *et al.* 1995; ASTANEI *et al.* 2005;  
23 ROSENZWEIG *et al.* 2008; SEARLE *et al.* 2009; CINI *et al.* 2012; PORRETTA *et al.* 2012; ANTUNES *et al.*  
24 2015). Signatures of the way organisms adapt to these events are often left in patterns of molecular variation  
25 within and between species (CHARLESWORTH *et al.* 2003; WRIGHT *et al.* 2003; EXCOFFIER *et al.* 2009).

26 When a population migrates to a new location it first goes through a population bottleneck (as only  
27 a small proportion of the population will establish in the new location) (CHARLESWORTH *et al.* 2003;  
28 EXCOFFIER *et al.* 2009; LI AND DURBIN 2011). These bottlenecks result in the loss of rare alleles in the  
29 population (TAJIMA 1989; GILLESPIE 2004). After the bottleneck, the population will grow to fill the  
30 carrying capacity of the new niche and adapt to the unique challenges in the new environment, both signaled  
31 by an excess of rare alleles (EXCOFFIER *et al.* 2009; WHITE *et al.* 2013). This adaptation can involve  
32 selective sweeps from new mutations or standing genetic variation, and signatures of adaptive evolution  
33 and local adaptation in genes key to the success of the population in this new location (CHARLESWORTH *et*

34 *al.* 2003; HERMISSON AND PENNINGNS 2005; McVEAN 2007; MESSER AND PETROV 2013). However, these  
35 signals can confound each other making inference of population history difficult. For example, both  
36 population expansions and adaptation lead to an excess of rare alleles, meaning more thorough analysis is  
37 required to identify the true cause of the signal (WRIGHT *et al.* 2003).

38 Signatures of demographic change are frequently detected in species that have recently undergone  
39 range expansion due to human introduction (ASTANEI *et al.* 2005; EXCOFFIER *et al.* 2009) or the changing  
40 climate (HEWITT 2000; PARMESAN AND YOHE 2003; GUINDON *et al.* 2010; WALSH *et al.* 2011; CINI *et al.*  
41 2012). Other hallmarks of invasive species population genomics include signatures of bottlenecks visible  
42 in the site frequency spectrum, and differentiation between populations (CHARLESWORTH *et al.* 2003; LI  
43 AND DURBIN 2011). This can be detected by a deficit of rare variants, a decrease in population pairwise  
44 diversity and an increase in the statistic, Tajima's D (TAJIMA 1989). Following the establishment and  
45 expansion of a population, there is an excess of rare variants and local adaptation results in divergence  
46 between the invading population and the original population. These signatures are also frequently utilized  
47 in human populations to identify traits which have fixed upon the establishment of a humans in a new  
48 location, or to identify how our human ancestors spread globally (LI AND DURBIN 2011).

49 The Madrean archipelago, located in southwestern USA and northwestern Mexico, contains  
50 numerous forested mountains known as 'Sky islands', separated by large expanses of desert (MCCORMACK  
51 *et al.* 2009; COE *et al.* 2012). These 'islands' were connected by lush forests during the previous glacial  
52 maximum which then retreated, leaving forest habitat separated by hundreds of miles of desert, presumably  
53 limiting migration between locations for most species (SURVEY 2005; MCCORMACK *et al.* 2009). The  
54 islands are hotbeds of ecological diversity. However, due to the changing climate in the past 100 years, they  
55 have become more arid, which may drive migration and adaptation (MCCORMACK *et al.* 2009; COE *et al.*  
56 2012).

57 *Drosophila innubila* is a mycophageous *Drosophila* species found throughout these Sky islands  
58 and thought to have arrived during the last glacial maximum (DYER AND JAENIKE 2005; DYER *et al.* 2005).  
59 Unlike the lab model *D. melanogaster*, *D. innubila* has a well-studied ecology (LACHAISE AND SILVAIN  
60 2004; DYER AND JAENIKE 2005; DYER *et al.* 2005; JAENIKE AND DYER 2008; UNCKLESS 2011a; UNCKLESS  
61 AND JAENIKE 2011; COE *et al.* 2012). In fact, in many ways the 'island' endemic, mushroom-feeding  
62 ecological model *D. innubila* represent a counterpoint to the human commensal, cosmopolitan, genetic  
63 workhorse *D. melanogaster*.

64 We sought to reconstruct the demographic and migratory history of *D. innubila* inhabiting the Sky  
65 islands. Isolated populations with limited migration provide a rare opportunity to observe replicate bouts of  
66 evolutionary change and this is particularly interesting regarding the coevolution with pathogens (DYER  
67 AND JAENIKE 2005; UNCKLESS 2011a). We also wanted to understand how *D. innubila* adapt to their local

68 climate and if this adaptation is recurrent or recent and specific to local population. We resequenced whole  
69 genomes of wild-caught individuals from four populations of *D. innubila* in four different Sky island  
70 mountain ranges. Surprisingly, we find little evidence of population structure by location, with structure  
71 limited to the mitochondria and a single chromosome (Muller element B which is syntenic with 2L in *D.*  
72 *melanogaster*) (MARKOW AND O'GRADY 2006). However, we find some signatures of local adaptation,  
73 such as for cuticle development and fungal pathogen resistance, suggesting potentially a difference in fungal  
74 pathogens and toxins between locations. We also find evidence of mitochondrial translocations into the  
75 nuclear genome, with strong evidence of local adaptation of these translocations, suggesting potential  
76 adaptation to changes in metabolic process of the host between location, and possibly even as a means of  
77 compensating for reduced efficacy of selection due to *Wolbachia* infection (JAENIKE AND DYER 2008).

## 78 **Results**

79 *Drosophila innubila* has recently expanded its geographic range and shows high levels of gene flow  
80 between geographically isolated populations

81 To characterize how *D. innubila* came to inhabit its current range, we collected flies from four Sky island  
82 locations across Arizona: Chiricahuas (CH, 81 flies), Huachucas (HU, 48 flies), Prescott (PR, 84 flies) and  
83 Santa Ritas (SR, 67 flies) (Figure 1). Interestingly, previous surveys mostly failed to collect *D. innubila*  
84 north of the Madrean archipelago in Prescott (DYER AND JAENIKE 2005). We easily sampled from that  
85 location, suggesting a possible recent invasion (though we were also unable to collect *D. innubila* in the  
86 exact locations previously sampled) (DYER AND JAENIKE 2005). If this was a recent colonization event, it  
87 could be associated with the changing climate of the area leading to conditions more accommodating to *D.*  
88 *innubila*, despite over 300 kilometers of geographic isolation (Figure 1).

89 To determine when *D. innubila* established each population and rates of migration between  
90 locations, we isolated and sequenced the DNA from our sampled *D. innubila* populations and characterized  
91 genomic variation. We then examined the population structure and changes in demographic history of *D.*  
92 *innubila* using silent polymorphism in Structure (FALUSH *et al.* 2003) and StairwayPlot (LIU AND FU 2015).  
93 We find all sampled populations have a current estimated effective population size ( $N_e$ ) of  $\sim 1,000,000$   
94 individuals and an ancestral  $N_e$  of  $\sim 4,000,000$  individuals, though all experience a bottleneck about 100,000  
95 years ago to an  $N_e$  of 10,000-20,000 (Figure 1, Supplementary Figure 1A & B). This bottleneck coincides  
96 with a known glaciation period occurring in Arizona (SURVEY 2005). Each surveyed population then  
97 appears to go through separate population expansions between one and thirty thousand years ago, with  
98 populations settling from south to north (Figure 1A, Supplementary Figure 1A & B). Specifically, while  
99 the HU population appears to have settled first (10-30 thousand years ago), the PR population was settled  
100 much more recently (200-2000 years ago). This, in combination of the absence of *D. innubila* in PR until

101 ~2016 sampling suggests recent northern expansion of *D. innubila* (Figure 1). Also note that StairwayPlot  
 102 (LIU AND FU 2015) has estimated large error windows for PR, meaning the invasion could be more recent  
 103 or ancient than the 200-2000 year estimate.

104 Given the geographic isolation between populations, we expected to find a corresponding signature  
 105 of population differentiation among the populations. Using Structure (FALUSH *et al.* 2003), we find  
 106 surprisingly little population differentiation between locations for the nuclear genome (Supplementary  
 107 Figure 1C) but some structure by location for the mitochondrial genome (Supplementary Figure 1D),  
 108 consistent with previous findings (DYER 2004; DYER AND JAENIKE 2005). Together these suggest that there  
 109 is still consistent gene flow between populations potentially via males.

110 **Figure 1: A.** Schematic of the range expansion of *D. innubila* and DiNV based on StairwayPlot results  
 111 across the four sample locations in Arizona (AZ), Chiracahua's (CH), Huachucas (HU), Prescott (PR) and  
 112 Santa Ritas (SR). **B and C.** Summary of Structure/F<sub>ST</sub> results for **B.** autosomal polymorphism and **C.**  
 113 mitochondrial polymorphism. Thickness of arrows in **B** and **C** indicates the median of F<sub>ST</sub> for genes in  
 114 each category, with 1 indicating completely isolated populations and 0 indicating complete gene flow.  
 115 Light grey lines show the Arizona border.

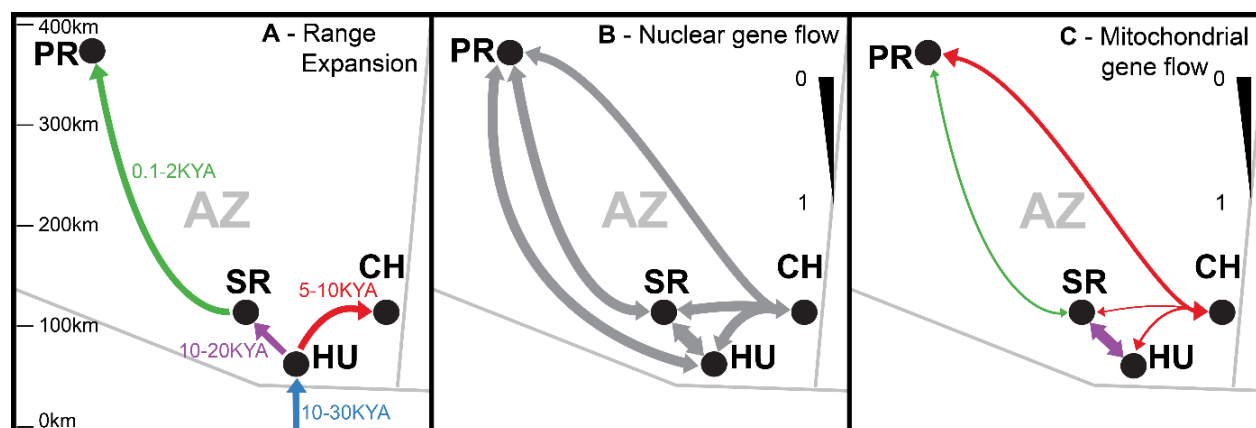

117 We also calculated the amount of differentiation between each population and all other populations,  
 118 as the fixation index, F<sub>ST</sub>, using the total polymorphism across the Muller elements (*Drosophila*  
 119 chromosomes) (WEIR AND COCKERHAM 1984). F<sub>ST</sub> appears to be generally low across the genes in the *D.*  
 120 *innubila* genome (Figure 1B, total median = 0.00567), consistent with nuclear gene flow between  
 121 populations (WEIR AND COCKERHAM 1984). In contrast, there is higher F<sub>ST</sub> between mitochondrial  
 122 genomes (Figure 1C). Both nuclear and mitochondrial results are consistent with the Structure/StairwayPlot  
 123 results. However, consistent with a more recent population contraction upon migration into PR, F<sub>ST</sub> of the  
 124 nuclear genome is significantly higher in PR (Figure 2A, GLM t-value = 93.728, *p*-value = 2.73e-102).  
 125 Though PR F<sub>ST</sub> is still extremely low genome-wide (PR median = 0.0105), with some outliers on Muller

126 element B like other populations (Supplementary Figure 2). We also calculated the population genetic  
 127 statistics pairwise diversity and Tajima's D for each gene using total polymorphism (TAJIMA 1989). As  
 128 expected with a recent population contraction in PR (suggesting recent migration and establishment in a  
 129 new location), pairwise diversity is significantly lower (Figure 2B, GLM t-value = -19.728,  $p$ -value = 2.33e-  
 130 86, Supplementary Table 2) and Tajima's D is significantly higher than all other populations (Figure 2C,  
 131 GLM t-value = 4.39,  $p$ -value = 1.15e-05, Supplementary Table 2). This suggests that there is also a deficit  
 132 of polymorphism in general in PR, consistent with a more recent population bottleneck, removing rare  
 133 alleles from the population (Figure 2C, Supplementary Figure 3). Conversely, the other populations show  
 134 a genome wide negative Tajima's D, consistent with a recent demographic expansion (Supplementary  
 135 Figure 3).

136 **Figure 2: Summary statistics for each population.** **A.** Distribution of  $F_{ST}$  across genes for each population  
 137 versus all other populations. **B.** Distribution of pairwise diversity for each population. **C.** Distribution of  
 138 Tajima's D for each population. **D.**  $F_{ST}$  distribution for Antifungal associated genes for each population. **E.**  
 139  $F_{ST}$  distribution for cuticular proteins for each population. **F.**  $F_{ST}$  distribution for all immune genes  
 140 (excluding antifungal genes). In A, B & C all cases significant differences from CH are marked with an \*  
 141 and outliers are removed for ease of visualization. In D, E & F, significant differences from the genome  
 142 background in each population are marked with a + and white diamond mark the whole genome average of  
 143  $F_{ST}$  for each population.

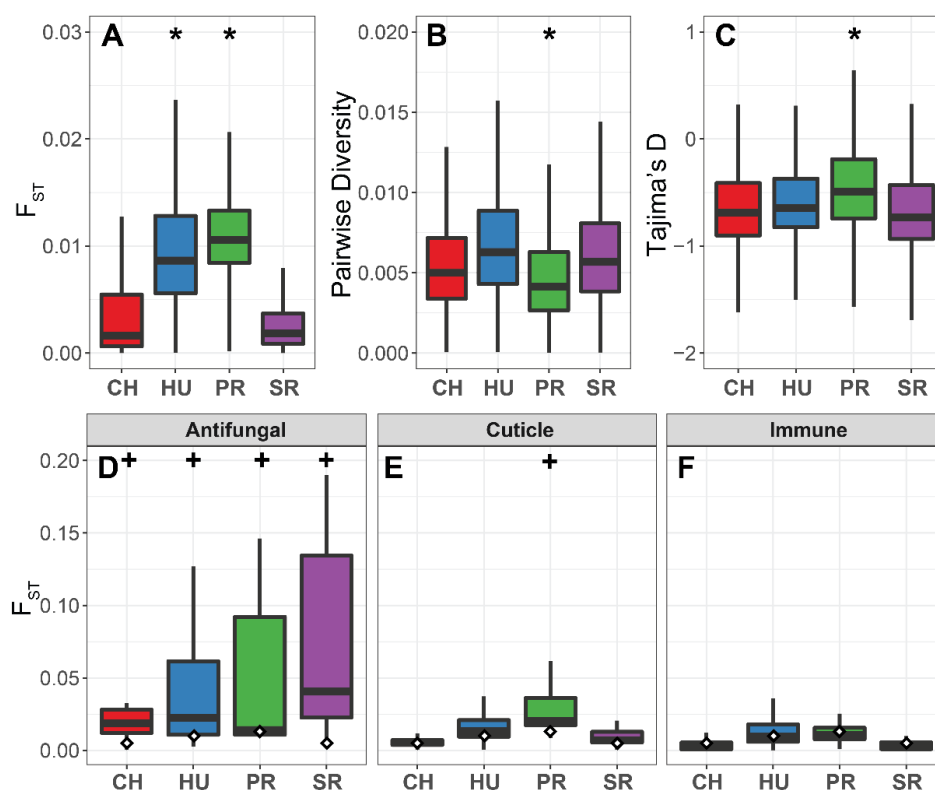

144

145 *Population structure in the D. innubila genome is associated with segregating inversions*

146 As mentioned previously,  $F_{ST}$  is significantly higher on Muller element B compared to all other elements  
147 in all populations (Supplementary Figure 2, GLM t-value = 30.02,  $p$ -value = 3.567e-56). On Muller element  
148 B, regions of elevated  $F_{ST}$  are similar in each population (Supplementary Figure 2). Additionally, Muller  
149 element B has elevated Tajima's D compared to all other Muller elements (Supplementary Figure 3),  
150 suggesting some form of structured population unique to Muller element B (GLM t-value = 10.402,  $p$ -value  
151 = 2.579e-25). We attempted to identify if this elevated structure is due to chromosomal inversions,  
152 comparing  $F_{ST}$  of a region to the presence or absence of inversions across windows (using only inversions  
153 called by both Delly and Pindel (YE *et al.* 2009; RAUSCH *et al.* 2012)). We find several inversions across  
154 the genome at appreciable frequencies (89 total above 1% frequency), of which, 37 are found on Muller  
155 element B (spread evenly across the entire chromosome) and 22 are found at the telomeric end of Muller  
156 element A (Figure 3A). The presence of an inversion over a region of Muller element B is associated with  
157 higher  $F_{ST}$  in these regions (Figure 3A, Wilcoxon Rank Sum test  $W = 740510$ ,  $p$ -value = 0.0129), though  
158 these inversions are not unique or even at different frequencies in specific populations ( $F_{ST} < 0.22$ ,  $\chi^2$  test  
159 for enrichment in a specific population  $p$ -value > 0.361 for all inversions). Genes within 10kbp of an  
160 inversion breakpoint have significantly higher  $F_{ST}$  than outside the inverted regions consistent with findings  
161 in other species (Figure 3C, GLM t-value = 7.702,  $p$ -value = 1.36e-14) (MACHADO *et al.* 2007; NOOR *et*  
162 *al.* 2007), while inside inverted regions show no difference from outside (Figure 3C, GLM t-value = -0.178,  
163  $p$ -value = 0.859). However, all regions of Muller element B have higher  $F_{ST}$  than the other Muller elements  
164 (Figure 3C, outside inversions Muller element B vs all other chromosomes: GLM t-value = 7.379,  $p$ -value  
165 = 1.614e-13), suggesting some chromosome-wide force drives the higher  $F_{ST}$  and Tajima's D. Given that  
166 calls for large inversions in short read data are often not well supported (CHAKRABORTY *et al.* 2017) and  
167 the apparently complex nature of the Muller element B inversions (Figure 3A), we may not have correctly  
168 identified the actual inversions and breakpoints on the chromosome. Despite this, our results do suggest a  
169 link between the presence of inversions on Muller element B and elevated differentiation in *D. innubila* and  
170 that this may be associated with local adaptation.

171 **Figure 3:** Summary of the inversions detected in the *Drosophila innubila* populations. **A.** Location and  
172 frequency in the total population of segregating inversions at higher than 1% frequency and greater than  
173 100kbp. **B.** Tajima's D and **C.**  $F_{ST}$  for genes across Muller element B, grouped by their presence under an  
174 inversion, outside of an inversion, near the inversion breakpoints (within 10kbp) or on a different Muller  
175 element.

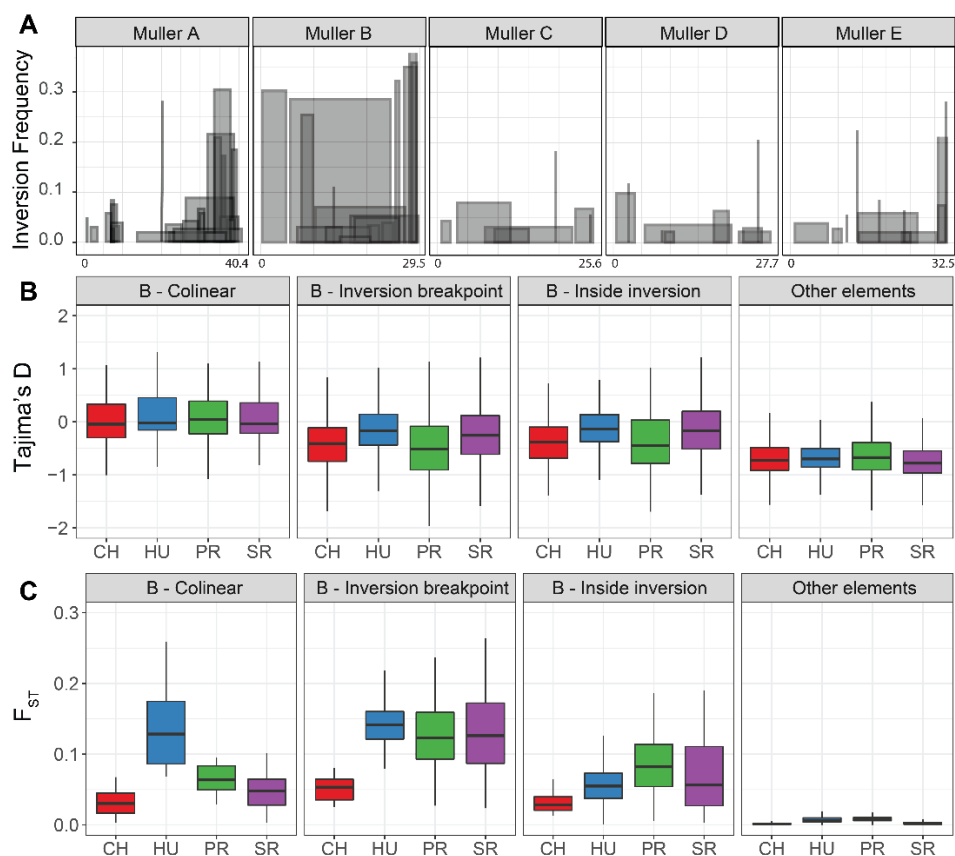

176

### 177 Evidence for local adaptation in each population

178 Though  $F_{ST}$  is low across most of the genome in each population, there are several genomic regions with  
 179 elevated  $F_{ST}$ . In addition to the entirety of Muller element B, there are narrow chimneys of high  $F_{ST}$  on  
 180 Muller elements D and E (Figure 4, Supplementary Figure 2). We attempted to identify whether any gene  
 181 ontology groups have significantly higher  $F_{ST}$  than the rest of the genome. We find that the genes in the  
 182 upper 2.5<sup>th</sup> percentile for  $F_{ST}$  are enriched for antifungal genes in all populations, these genes are distributed  
 183 across the genome and so not all under one peak of elevated  $F_{ST}$  (Supplementary Table 3, GO enrichment  
 184 = 16.414,  $p$ -value = 1.61e-10). Interestingly, this is the only immune category with elevated  $F_{ST}$  (Figure  
 185 2F), with most of the immune system showing no divergence between populations (Figure 2F,  
 186 Supplementary Figure 4). This might suggest that most pathogen pressures are consistent among  
 187 populations except for fungal pathogen pressure which may be more variable.

188 Another gene ontology category with significantly higher  $F_{ST}$  is cuticle genes (Figure 2E,  
 189 Supplementary Table 3, GO enrichment = 5.03,  $p$ -value = 8.68e-08), which could be associated with  
 190 differences in the environment between locations (toxin exposure, humidity, *etc.*). Consistent with this  
 191 result, the peak of  $F_{ST}$  on Muller element D (Figure 5, Muller element D, 11.56-11.58Mb) is composed of  
 192 exclusively cuticle development proteins (e.g. Cpr65Au, Cpr65Av, Lcp65Ad) with elevated  $F_{ST}$  in these



193 genes in both the SR and HU populations as well as PR (Figure 5), suggesting that they may be adapting to  
194 differing local conditions in those populations.

195 Two other clear peaks on Muller element E are also composed related genes. Interestingly, there  
196 appear to be three regions of the *D. innubila* genome with translocated mitochondrial genes (Figure 5). The  
197 first peak (Muller element E, 11.35-11.4Mb) is composed exclusively of one of these translocated  
198 mitochondrial regions with 3 mitochondrial genes (including cytochrome oxidase II). The second peak  
199 (Muller element E, 23.60-23.62Mb) contains four other mitochondrial genes (including cytochrome oxidase  
200 III and ND5) as well as genes associated with nervous system activity (such as *Obp93a* and *Obp99c*). We  
201 find no correlation between coverage of these regions and mitochondrial copy number (Supplementary  
202 Table 1, Pearson's correlation t-value = 0.065,  $p$ -value = 0.861), so this elevated  $F_{ST}$  is probably not an  
203 artefact of mis-mapping reads. However, we do find these regions have elevated copy number compared to  
204 the rest of the genome (Supplementary Figure 5, GLM t-value = 9.245,  $p$ -value = 3.081e-20), and so this  
205 elevated divergence may be due to collapsed paralogs. These insertions of mtDNA are also found in *D.*  
206 *falleni* and are diverged from the mitochondrial genome, suggesting ancient transpositions. The nuclear  
207 insertions of mitochondrial genes are also enriched in the 97.5<sup>th</sup> percentile for  $F_{ST}$  in HU and PR, when  
208 looking at only autosomal genes (Supplementary Table 3, GO enrichment = 4.53,  $p$ -value = 3.67e-04).  
209 Additionally, several other energy metabolism categories are in the upper 97.5<sup>th</sup> percentile in CH. Overall  
210 these results suggests a potential divergence in the metabolic needs of each population, and that several  
211 mitochondrial genes may have found a new function in the *D. innubila* genome and may be diverging due  
212 to differences in local conditions. Alternatively, given the male-killing *Wolbachia* parasitizing *D. innubila*  
213 (DYER 2004), it is possible the mitochondrial translocations contain functional copies of mitochondrial  
214 genes that can efficiently respond to selection unlike their still mtDNA-linked paralogs.

215 There has been considerable discussion over the last several years about the influence of  
216 demographic processes and background selection on inference of local adaptation (CUTTER AND PAYSEUR  
217 2013; CRUICKSHANK AND HAHN 2014; HOBAN *et al.* 2016; MATTHEY-DORET AND WHITLOCK 2018). In  
218 contrast to  $F_{ST}$  which is a relative measure of population differentiation,  $D_{XY}$  is an absolute measure that  
219 may be less sensitive to other population-level processes (NEI 1987; CRUICKSHANK AND HAHN 2014). In  
220 our data, windows with peaks of elevated  $F_{ST}$  also have peaks of  $D_{XY}$  in all pairwise comparisons (Figure  
221 4, Supplementary Figure 6), and  $F_{ST}$  and  $D_{XY}$  are significantly correlated (GLM  $R^2 = 0.823$ , t-value =  
222 11.371,  $p$ -value = 6.33e-30), consistent with local adaptation. The upper 97.5<sup>th</sup> percentile for  $D_{XY}$  is  
223 enriched for chorion proteins in all pairwise comparisons and antifungal proteins for all comparisons  
224 involving PR (Supplementary Table 5). We also find peaks of elevated pairwise diversity exclusively on  
225 the mitochondrial translocations (Supplementary Figure 6), suggesting unaccounted for variation in these  
226 genes which is consistent with duplications detected in these genes (RASTOGI AND LIBERLES 2005). This

227 supports the possibility that unaccounted for duplications may be causing the elevated  $F_{ST}$ ,  $D_{XY}$  and pairwise  
228 diversity (Supplementary Figure 5 & 6). We find no evidence for duplications in the antifungal, cuticle or  
229 chorion proteins, suggesting the elevated  $F_{ST}$  and  $D_{XY}$  is likely due to local adaptation (Figure 4,  
230 Supplementary Figure 5).

231 Recent adaptation often leaves a signature of a selective sweep with reduced polymorphism near  
232 the site of the selected variant. We attempted to identify selective sweeps in each population using  
233 Sweepfinder2 (HUBER *et al.* 2016). There was no evidence of selective sweeps overlapping with genes with  
234 elevated  $F_{ST}$  (Supplementary Figure 7A,  $\chi^2$  test for overlap of 97.5<sup>th</sup> percentile windows  $\chi^2 = 1.33$   $p$ -value  
235 = 0 .249) but there was one extreme peak in PR on Muller D (Supplementary Figure 7B, Muller D, 18.75-  
236 19Mb). This peak was also found in all other populations though not on the same scale. The center of this  
237 peak is just upstream of the cuticle protein *Cpr66D*, in keeping with the suggestion of local adaptation of  
238 the cuticle in all populations, with the strongest signal in PR. This sweep is also upstream of four chorion  
239 proteins (*Cp15*, *Cp16*, *Cp18*, *Cp19*) and covers (within 10kbp of the sweep center) several cell organization  
240 proteins (*Zasp66*, *Pex7*, *hairy*, *Prm*, *Fhos*). These chorion proteins also have significantly elevated  $D_{XY}$   
241 compared to other genes within 50kbp (Wilcoxon Rank Sum  $W = 45637000$ ,  $p$ -value = 0.0158) and are  
242 under a chimney of elevated  $D_{XY}$  in all comparisons (Supplementary Figure 6 & 7), consistent with recent  
243 selection of population specific variants. We also find evidence of several selective sweeps in the telomere  
244 of the X chromosome (Muller A, 39.5-40.5Mb), among several uncharacterized genes. Given the  
245 suppression of recombination in the heterochromatic portions of chromosomes, we would expect evidence  
246 for several selective sweeps for even weakly positively selected variants, as is also seen in the non-  
247 recombining Muller F (Supplementary Figure 7).

248 **Figure 4:** Comparison of estimated statistics across the *D. innubila* genome for the Prescott (PR)  
249 population. Values are as follows: the average pairwise divergence per gene ( $D_{XY}$ ), the population fixation  
250 index per genes ( $F_{ST}$ ), within population pairwise diversity per genes, Compositive Likelihood Ratio (CLR)  
251 per SNP calculated using Sweepfinder2 and within population average Tajima's D per gene.

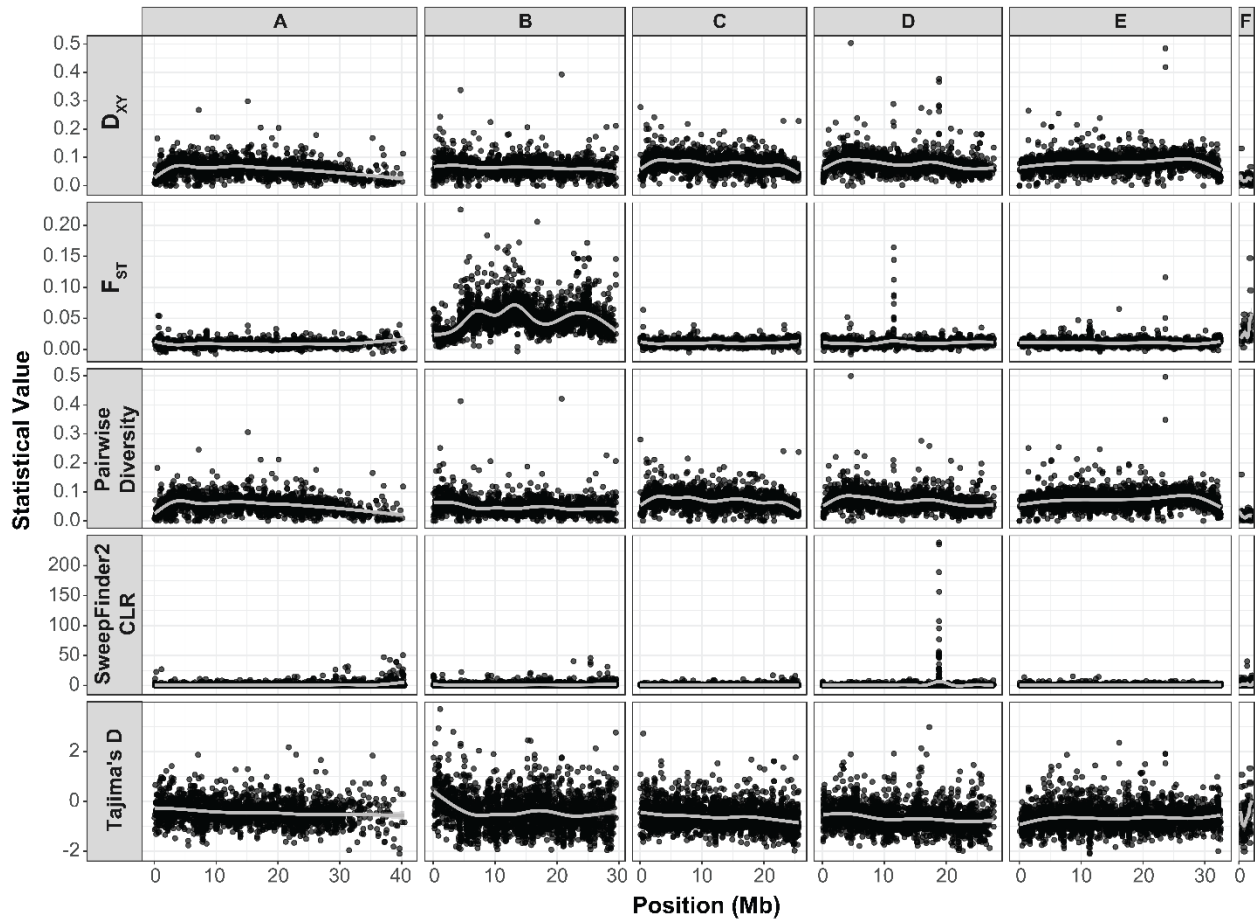

252

253 **Figure 5:** Gene-wise  $F_{ST}$  showing regions of elevated divergence between populations for each population.  
 254 Plot shows  $F_{ST}$  for each gene in these regions to identify the causal genes. Genes with noted functions  
 255 (cuticle development or mitochondrial translocations) are shown by point shape. Note the Y-axes are on  
 256 different scales for each plot.

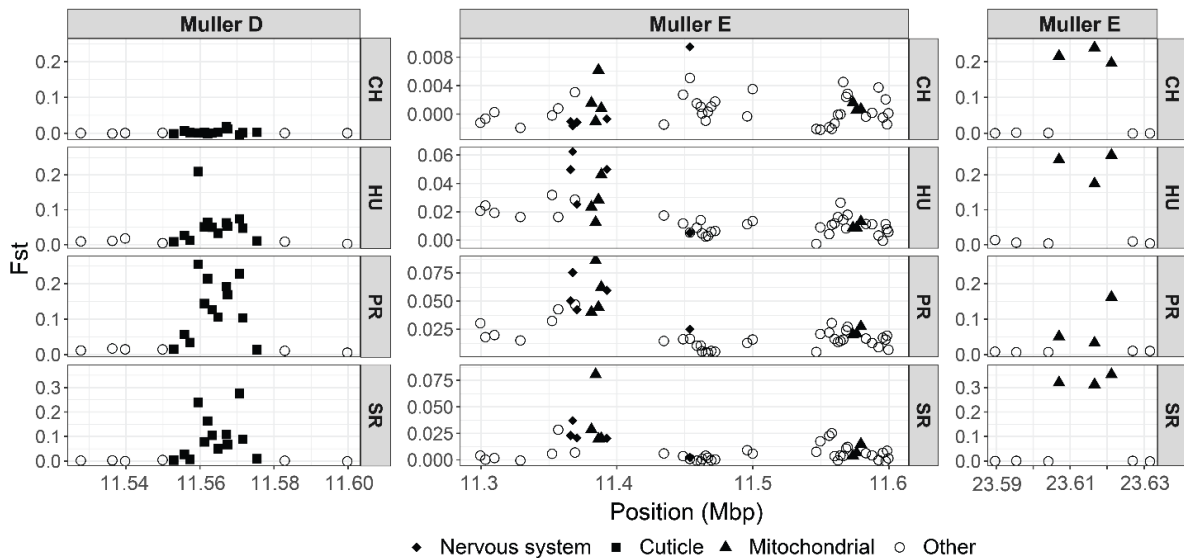

257

258 *Evidence for divergence in the X chromosome over time and between sexes*

259 We next compared the samples from the 35 CH males in 2017 to those we sequenced from a CH collection  
260 of 38 males in 2001 to identify changes over time between populations (due to elevated  $F_{ST}$  because of  
261 differences in allele frequencies between populations). We find little differentiation between the two  
262 timepoints (median  $F_{ST}$  = 0.0004, 99<sup>th</sup> percentile = 0.0143), and find no significant enrichments (GO  $p$ -  
263 value < 0.05) in the upper 97.5<sup>th</sup> percentile of  $F_{ST}$ . However, we do find divergence in the genes at the  
264 telomere of the X chromosome (Supplementary Figure 8A, Muller element A, 35-40.5Mb, median  $F_{ST}$  =  
265 0.0029). Looking at actual allele frequency differences between time points, the minor allele frequency  
266 increases between 2001 and 2017 at the X telomere while most other chromosomes appear to show little  
267 change. Interestingly, there is also evidence of recent selective sweeps in the telomere of X (Supplementary  
268 Figure 7A). The minor allele frequency has decreased on average on Muller element B between 2001 and  
269 2017 (Supplementary Figure 9A). This suggests something else may be influencing allele frequency change  
270 on Muller B compared to other autosomes.

271 We also compared the allele frequencies between 2017 male samples versus 2017 female samples.  
272 Again,  $F_{ST}$  is extremely low genome wide (median  $F_{ST}$  = 0.0004, 99<sup>th</sup> percentile = 0.0501), but we again  
273 find a peak of  $F_{ST}$  at the telomere of the X chromosome (Supplementary Figure 8B), which we find when  
274 comparing all populations sexes and in a total population male versus female comparison. Again, we find  
275 no significant enrichments in the 97.5<sup>th</sup> percentile for  $F_{ST}$ , as most of the divergent genes currently have no  
276 functional annotation. We also compared the raw allele frequency change of synonymous variants.  
277 Strangely, the population minor allele frequency of euchromatic SNPs on the X chromosome are found at  
278 higher frequencies in females (Supplementary Figure 9B), while the X telomere SNPs are overrepresented  
279 in male samples. These results are consistent when examining each population separately, suggesting sex  
280 specific biases in the X chromosome are found in every populations. It is possible that this signal is caused  
281 by an ascertainment bias for SNP calling in females, resulting in more accurate SNP calls in one of the  
282 sexes in the euchromatin which is not seen in the heterochromatin. Alternatively, the region of the X  
283 chromosome with multiple overlapping inversions could be female-biased due to a female driver, resulting  
284 in its overrepresentation in females (and an overrepresentation of the alternate variants in males) (BURT  
285 AND TRIVERS 2006). Finally, the X chromosome may be adapting to the skewed sex-ratio associated with  
286 *D. innubila*'s male-killing *Wolbachia* (KAGEYAMA *et al.* 2009; UNCKLESS 2011b).

287 *Toll-related immune genes are evolving recurrently in D. innubila likely due to strong pathogen pressures*

288 We next sought to identify genes and functional categories showing strong signatures of adaptive evolution,  
289 suggesting recurrent evolution as opposed to recent local adaptation. We reasoned that if the population  
290 differentiation seen in antifungal genes and cuticle development proteins (Figure 2 & 3, Supplementary

291 Figure 4) was due to local adaptation also acting over longer time periods, we would expect to see signatures  
292 of adaptation in those categories. Furthermore, Hill *et al.* used dN/dS-based statistics to show that genes  
293 involved in some immune defense pathways were among the fastest evolving genes in the *D. innubila*  
294 genome (HILL *et al.* 2019). We also sought to identify what genes are evolving due to recurrent positive  
295 selection in *D. innubila* in one or all populations, and if this is associated with environmental factors. To  
296 this end we calculated the McDonald-Kreitman based statistic direction of selection (DoS) (Stoletzki and  
297 Eyre-Walker, 2011) and SnIPRE selection effect (Eilertson *et al.*, 2012) to identify an excess of selection.  
298 We then fit a linear model to identify gene ontology groups with significantly higher DoS or selection effect  
299 than expected. In this survey we find cuticle genes and antifungal genes did have some signatures of  
300 adaptive evolution (DoS > 0 and selection effect > 0 for 80% of genes in these categories) but as a group  
301 showed no significant differences from the background (GLM t-value = 1.128, *p*-value = 0.259,  
302 Supplementary Table 4). In fact, we only found two functional groups significantly higher than the  
303 background, Toll signaling proteins (GLM t-value = 2.581 *p*-value = 0.00986, Supplementary Table 3) and  
304 antimicrobial peptides (AMPs, GLM t-value = 3.66 *p*-value = 0.00025, Supplementary Table 3). In a  
305 previous survey we found that these categories were also the only functional groups to have significantly  
306 elevated rates of amino acid divergence (HILL *et al.* 2019). These results suggest that this divergence is  
307 indeed adaptive.

308 Interestingly, *D. innubila* is burdened by *Drosophila innubila* nudivirus (DiNV), a Nudivirus that  
309 infects 40-50% of individuals in the wild (UNCKLESS 2011a). A close relative of the virus suppresses Toll-  
310 regulated AMPs in *D. melanogaster* (PALMER *et al.* 2018), which might explain why the Toll pathway and  
311 AMPs are fast evolving in *D. innubila*. Five AMPs showed consistently positive DoS and selection effect  
312 values (which are also among the highest in the genome): four *Bomanins* and *Listericin*. All are AMPs  
313 regulated by Toll signaling (and additionally JAK-STAT in the case of *Listericin*) (HOFFMANN 2003;  
314 TAKEDA AND AKIRA 2005). *Listericin* has been implicated in the response to viral infection due to its  
315 expression upon viral infection (DOSTERT *et al.* 2005; ZAMBON *et al.* 2005; IMLER AND ELFTHERIANOS  
316 2009; MERKLING AND VAN RIJ 2013). For all immune categories, as well as cuticle proteins and antifungal  
317 proteins, we find no significant differences between populations for either MK-based statistics, and no  
318 significant differences in the distribution of these statistics between populations (GLM t-value < 0.211, *p*-  
319 value > 0.34 for all populations, Supplementary Table 3). Thus, perhaps selection at these loci is ubiquitous  
320 and genes flow between populations homogenizes that signature.

321 Mutation rates, efficacy of selection and population structure can vary across the genome, which  
322 can confound scans for selection (CHARLESWORTH *et al.* 2003; STAJICH AND HAHN 2005). To work around  
323 this, we employed a control-gene resampling approach to identify the average difference from the  
324 background for each immune category (CHAPMAN *et al.* 2019). Consistent with our results previous results,

325 we find no signatures of recurrent positive selection in antifungal genes (Supplementary Figure 10, 61%  
 326 resamples > 0) or cuticle genes (Figure 6, 54% resamples > 0) but do again find extremely high levels of  
 327 positive selection in AMPs (Figure 6, 100% resamples > 0) and Toll signaling genes (Figure 6, 99.1%  
 328 resamples > 0). Segregating slightly deleterious mutations can bias inference of selection using McDonald-  
 329 Kreitman based tests (MESSER AND PETROV 2012). To account for this bias, we also calculated asymptotic  
 330  $\alpha$  for all functional categories across the genome (HALLER AND MESSER 2017). To this end we calculated  
 331 the asymptotic  $\alpha$  for all functional categories across the genome (HALLER AND MESSER 2017). As before,  
 332 while we find signals for adaptation in antifungal and cuticle proteins (asymptotic  $\alpha > 0$ ), we find no  
 333 evidence of higher rates of adaptation than the background (Supplementary Figure 10, permutation test  
 334 Antifungal  $p$ -value = 0.243, Cuticle  $p$ -value = 0.137). Again, the only categories significantly higher than  
 335 the background are Toll signaling genes (Permutation test  $p$ -value = 0.033) and AMPs (Permutation test  $p$ -  
 336 value = 0.035). Together these results suggest that while genes involved in antifungal resistance and cuticle  
 337 development are evolving adaptively, it is not recurrent across the whole functional category, instead only  
 338 occurring in one or two specific genes. Alternatively, the adaptation may be too recent to detect signal using  
 339 these metrics. Long-term recurrent adaptation appears to be driven by host-pathogen interactions (likely  
 340 with DiNV (HILL *et al.* 2019)) as opposed to local adaptation.

341 **Figure 6:** McDonald-Kreitman based statistics for immune categories in *D. innubila* and cuticle  
 342 development. The left two plots show estimated statistics (Direction of Selection and Selection Effect) for  
 343 each gene. The right two plots show the difference in average statistic (Direction of Selection and Selection  
 344 Effect) for each gene and a randomly sampled nearby gene.

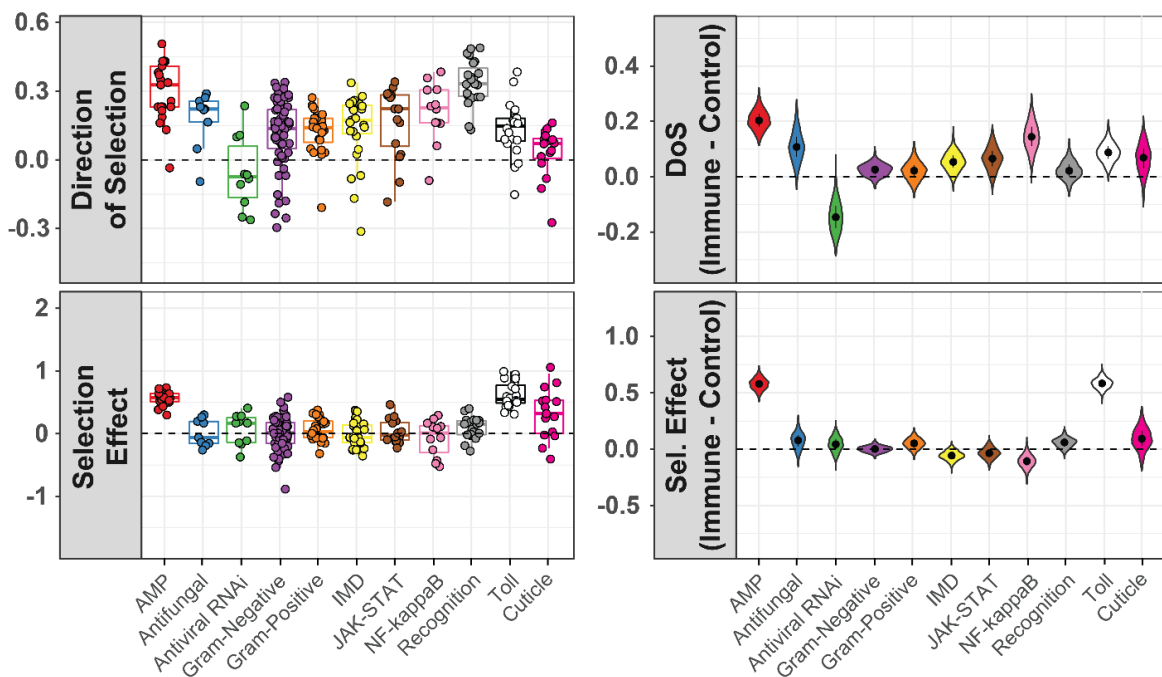

345

## 346 Discussion

347 Migration and environmental change can drive adaptation (RANKIN AND BURCHSTED 1992;  
348 CHARLESWORTH *et al.* 2003; GILLESPIE 2004; EXCOFFIER *et al.* 2009; PORRETTA *et al.* 2012; WHITE *et al.*  
349 2013). Species with somewhat isolated or divided populations are likely to adapt to their differing local  
350 environments. Migration can both facilitate and hinder such adaptation, allowing new variation (including  
351 potentially beneficial variants) to be spread between populations and preventing inbreeding depression.  
352 Strong migration can also import locally nonadaptive variants and prevent the fixation of the most fit  
353 variants in local populations. We sought to examine the extent that these processes take place in a species  
354 of *Drosophila* found across four forests separated by large expanses of desert.

355 We characterized the phylogeographic history of four populations of *Drosophila innubila*, a  
356 mycophagous species endemic to the Arizonan Sky islands using whole genome resequencing of wild-  
357 caught individuals. *D. innubila* expanded into its current range during or following the previous glacial  
358 maximum (Figure 1, Supplementary Figure 1). We find some evidence of local adaptation, primarily in the  
359 cuticle development genes and antifungal immune genes (Figure 2, Supplementary Figure 2). Interestingly,  
360 there is very little support for population structure across the nuclear genome (Figures 1 & 2, Supplementary  
361 Figures 1 & 2), including in the repetitive content (Supplementary Figure 11), but some evidence of  
362 population structure in the mitochondria, as found previously in *D. innubila* (DYER AND JAENIKE 2005).  
363 This suggests that if gene flow is occurring, it could be primarily males migrating, as is seen in other non-  
364 *Drosophila* species (RANKIN AND BURCHSTED 1992; SEARLE *et al.* 2009; MA *et al.* 2013; AVGAR AND  
365 FRYXELL 2014). Based on the polymorphism data available, coalescent times are not deep, and given our  
366 estimated population history, this suggests that variants aren't ancestrally maintained and are instead  
367 transmitted through migration between locations (CHARLESWORTH *et al.* 2003).

368 Segregating inversions are often associated with population structure and could explain the  
369 abnormalities seen on Muller element B here (Supplementary Figures 2-5). Our detection of several putative  
370 segregating inversions on Muller element B relative to all other chromosomes (Figure 3A) supports this  
371 assertion. However, few of the putative inversions support this hypothesis, in that all are large and common  
372 inversions characterized in all populations, suggesting the inversions are not driving the elevated  $F_{ST}$ . We  
373 suspect that the actual causal inversions may not have been characterized due to the limitations of detecting  
374 inversions in repetitive regions with short read data (MARZO *et al.* 2008; CHAKRABORTY *et al.* 2017). The  
375 elevated  $F_{ST}$  could also be caused by other factors, such as extensive duplication and divergence on Muller  
376 element B being misanalysed as just divergence. In fact, the broken and split read pairs used to detect  
377 inversions are very similar to the signal used to detect duplications (YE *et al.* 2009; RAUSCH *et al.* 2012;  
378 CHEN *et al.* 2016), suggesting some misidentification may have occurred. If a large proportion of Muller B  
379 was duplicated, we would see elevated mean coverage of Muller element B in all strains compared to other

380 autosomes, which is not the case (Supplementary Table 1). Further study is necessary to disentangle if  
381 inversions or other factors are causing this elevated  $F_{ST}$  and the selective and/or demographic pressures  
382 driving this differentiation. However, it is worth noting that *D. pseudoobscura* segregates for inversions on  
383 Muller element C and these segregate by population in the same Sky island populations (and beyond) as  
384 the populations described here (DOBZHANSKY AND STURTEVANT 1937; DOBZHANSKY *et al.* 1963; FULLER  
385 *et al.* 2016). Thus, the inversion polymorphism among populations is a plausible area for local adaptation  
386 and may provide an interesting contrast to the well-studied *D. pseudoobscura* inversions.

387 We find very few signatures of divergence between samples from 2001 and 2017 (Supplementary  
388 Figure 8). Though the environment has changed in the past few decades, there may have been little impact  
389 on the habitat of *D. innubila* in the Chiricahuas, resulting in few changes in selection pressures in this short  
390 period of time, unlike most bird and mammal's species in the same area (COE *et al.* 2012). Interestingly,  
391 there was an extensive forest fire in 2011 which could plausibly have been a strong selective force but we  
392 see no genome-wide signature of such (ARECHEDERRA-ROMERO 2012). Alternatively, seasonal  
393 fluctuations in allele frequencies may swamp out directional selection. Excessive allele frequency change  
394 is limited to a few genes with no known association to each other, and little overlap with the diverging  
395 genes between populations. Some of the genes with elevated  $F_{ST}$  (and differing in allele frequency) between  
396 time points overlap with divergent genes between sexes, primarily at the telomere of the X chromosome  
397 (Muller element A, Supplementary Figure 8). In fact,  $F_{ST}$  is significantly correlated on Muller element A  
398 between the two surveys (Pearson's correlation  $t = 82.411$ ,  $p\text{-value} = 1.2e-16$ ), even with the 2001-2017  
399 survey only considering male samples, supporting an association between the factors driving divergence  
400 between sexes and over time. Given the sex bias of SNPs in this region, this could suggest that a selfish  
401 factor with differential effects in the sexes is located on the X chromosome near the telomere (BURT AND  
402 TRIVERS 2006). Often these selfish elements also accumulate inversions to prevent the breakdown of  
403 synergistic genetic components (BURT AND TRIVERS 2006), and the Muller A telomere appears to have  
404 accumulated several inversions (Figure 3A). However, populations of *D. innubila* are already female-biased  
405 due to the male-killing *Wolbachia* infection found in 30-35% of females (DYER 2004; DYER AND JAENIKE  
406 2005; JAENIKE AND DYER 2008). Thus *D. innubila* could be simultaneously parasitized by both the male-  
407 killing *Wolbachia* and a selfish X chromosome. Alternatively, the strong signals associated with the  
408 telomere of the X could be a signature of selection related to the *Wolbachia* infection (UNCKLESS 2011b).

409 Ours is one of few studies that sequences individual wild-caught *Drosophila* and therefore avoids  
410 several generations of inbreeding that would purge recessive deleterious alleles (GILLESPIE 2004; MACKAY  
411 *et al.* 2012; POOL *et al.* 2012). The excess of putatively deleterious alleles harkens back to early studies of  
412 segregating lethal mutations in populations as well as recent work on humans (DOBZHANSKY *et al.* 1963;  
413 MARINKOVIC 1967; DOBZHANSKY AND SPASSKY 1968; WATANABE *et al.* 1974; GAO *et al.* 2015).



414 To date, most of the genomic work concerning the phylogeography and dispersal of different  
415 *Drosophila* species has been limited to the *melanogaster* supergroup (POOL *et al.* 2012; POOL AND  
416 LANGLEY 2013; BEHRMAN *et al.* 2015; LACK *et al.* 2015; MACHADO *et al.* 2015), with some work in other  
417 *Sophophora* species (FULLER *et al.* 2016). This limits our understanding of how non-commensal species  
418 disperse and behave, and what factors seem to drive population demography over time. Here we have  
419 glimpsed into the dispersal and history of a species of mycophageous *Drosophila* and found evidence of  
420 changes in population distributions potentially due to the changing climate (SURVEY 2005) and population  
421 structure possibly driven by segregating inversions and selfish elements. Because many species have  
422 recently undergone range changes or expansions (EXCOFFIER *et al.* 2009; PORRETTA *et al.* 2012; WHITE *et*  
423 *al.* 2013), we believe examining how this has affected genomic variation is important for population  
424 modelling and even for future conservation efforts (EXCOFFIER *et al.* 2009; COE *et al.* 2012).

## 425 **Methods**

### 426 *Fly collection, DNA isolation and sequencing*

427 We collected wild *Drosophila* at the four mountainous locations across Arizona between the 22<sup>nd</sup> of August  
428 and the 11<sup>th</sup> of September 2017: the Southwest research station in the Chiricahua mountains (CH, ~5,400  
429 feet elevation, 31.871 latitude -109.237 longitude, 96 flies), in Prescott National Forest (PR, ~7,900 feet  
430 elevation, 34.586 latitude -112.559 longitude, 96 flies), Madera Canyon in the Santa Rita mountains (SR,  
431 ~4,900 feet elevation, 31.729 latitude -110.881 longitude, 96 flies) and Miller Peak in the Huachuca  
432 mountains (HU, ~5,900 feet elevation, 31.632 latitude -110.340 longitude, 53 flies) (COE *et al.* 2012). Baits  
433 consisted of store-bought white button mushrooms (*Agaricus bisporus*) placed in large piles about 30cm in  
434 diameter, with at least 5 baits per location. We used a sweep net to collect flies over the baits in either the  
435 early morning or late afternoon between one and three days after the bait was set. We sorted flies by sex  
436 and species at the University of Arizona in Tucson, AZ and flash frozen at -80°C before shipping on dry  
437 ice to the University of Kansas in Lawrence KS.

438 We sorted 343 flies (172 females and 171 males) which phenotypically matched *D. innubila*. We  
439 then homogenized and extracted DNA using the Qiagen Genra Puregene Tissue kit (USA Qiagen Inc.,  
440 Germantown, MD, USA). We also prepared the DNA of 40 *D. innubila* collected in 2001 from CH. We  
441 prepared a genomic DNA library of these 383 DNA samples using a modified version of the Nextera DNA  
442 library prep kit (~ 350bp insert size) meant to conserve reagents. We sequenced the libraries on four lanes  
443 of an Illumina HiSeq 4000 (150bp paired end) (Supplementary Table 1, Data to be deposited in the NCBI  
444 SRA).

### 445 *Sample filtering, mapping and alignment*

446 We removed adapter sequences using Scythe (BUFFALO 2018), trimmed all data using cutadapt to remove  
447 barcodes (MARTIN 2011) and removed low quality sequences using Sickle (parameters: -t sanger -q 20 -l  
448 50) (JOSHI AND FASS 2011). We masked the *D. innubila* reference genome, using *D. innubila* TE sequences  
449 generated previously and RepeatMasker (parameters: -s -gccalc -gff -lib customLibrary) (SMIT AND  
450 HUBLEY 2013-2015; HILL *et al.* 2019). We then mapped the short reads to the masked *D. innubila* genome  
451 using BWA MEM (LI AND DURBIN 2009), and sorted and indexed using SAMTools (LI *et al.* 2009).  
452 Following mapping, we added read groups, marked and removed sequencing and optical duplicates, and  
453 realigned around indels in each mapped BAM file using Picard and GATK  
454 ([HTTP://BROADINSTITUTE.GITHUB.IO/PICARD](http://broadinstitute.github.io/picard) ; MCKENNA *et al.* 2010; DEPRISTO *et al.* 2011). We then  
455 removed individuals with low coverage of the *D. innubila* genome (less than 5x coverage for 80% of the  
456 non-repetitive genome), and individuals we suspected of being misidentified as *D. innubila* following  
457 collection due to anomalous mapping. This left us with 280 *D. innubila* wild flies (48 - 84 flies per  
458 populations) from 2017 and 38 wild flies from 2001 with at least 5x coverage across at least 80% of the  
459 euchromatic genome (Supplementary Table 1).

#### 460 *Nucleotide polymorphisms across the population samples*

461 For the 318 sequenced samples with reasonable coverage, we called SNPs using GATK (MCKENNA *et al.*  
462 2010; DEPRISTO *et al.* 2011) which generated a multiple strain VCF file. We then used BCFtools  
463 (NARASIMHAN *et al.* 2016) to remove sites with a GATK quality score (a composite PHRED score for  
464 multiple samples per site) lower than 950 and sites absent (e.g. sites of low quality, or with 0 coverage)  
465 from over 5% of individuals. This filtering left us with 4,522,699 SNPs and small indels across the 168Mbp  
466 genome of *D. innubila*. We then removed SNPs found as a singleton in a single population (as possible  
467 errors), leaving us with 3,240,198 SNPs. We used the annotation of *D. innubila* and SNPeff (CINGOLANI  
468 *et al.* 2012) to identify SNPs as synonymous, non-synonymous, non-coding or another annotation.  
469 Simultaneous to the *D. innubila* population samples, we also mapped genomic information from outgroup  
470 species *D. falleni* (SRA: SRR8651761) and *D. phalerata* (SRA: SRR8651760) to the *D. innubila* genome  
471 and called divergence using the GATK variation calling pipeline to identify derived polymorphisms and  
472 fixed differences in *D. innubila*.

#### 473 *Population genetic summary statistics and structure*

474 Using the generated total VCF file with SNPeff annotations, we created a second VCF containing only  
475 synonymous polymorphism using BCFtools (NARASIMHAN *et al.* 2016). We calculated pairwise diversity  
476 per base, Watterson's theta, Tajima's D (TAJIMA 1989) and  $F_{ST}$  (WEIR AND COCKERHAM 1984) (versus all  
477 other populations) across the genome for each gene in each population using VCFtools (DANECEK *et al.*  
478 2011) and the VCF containing all variants. Using ANGSD to parse the synonymous polymorphism VCF

479 (KORNELIUSSEN *et al.* 2014), we generated synonymous unfolded site frequency spectra for the *D. innubila*  
480 autosomes for each population, using the *D. falleni* and *D. phalerata* genomes as outgroups to the *D.*  
481 *innubila* genome (HILL *et al.* 2019).

482 We used the population silent SFS with previously estimated mutation rates of *Drosophila*  
483 (SCHRIDER *et al.* 2013), as inputs in StairwayPlot (LIU AND FU 2015), to estimate the effective population  
484 size backwards in time for each location.

485 We also estimated the extent of population structure across samples using Structure (FALUSH *et al.*  
486 2003), repeating the population assignment for each chromosome separately using only silent  
487 polymorphism, for between one and ten populations ( $k = 1-10$ , 100000 iterations burn-in, 400000 iterations  
488 sampling). Following (FRICHOT *et al.* 2014), we manually assessed which number of subpopulations best  
489 fits the data for each *D. innubila* chromosome and DiNV to minimize entropy.

#### 490 *Signatures of local adaptive divergence across D. innubila populations*

491 We downloaded gene ontology groups from Flybase (GRAMATES *et al.* 2017). We then used a gene  
492 enrichment analysis to identify enrichments for particular gene categories among genes in the 97.5<sup>th</sup>  
493 percentile and 2.5<sup>th</sup> percentile for  $F_{ST}$ , Tajima's D and Pairwise Diversity versus all other genes  
494 (SUBRAMANIAN *et al.* 2005). Due to differences on the chromosomes Muller A and B versus other  
495 chromosomes in some cases, we also repeated this analysis chromosome by chromosome, taking the upper  
496 97.5<sup>th</sup> percentile of each chromosome.

497 We next attempted to look for selective sweeps in each population using Sweepfinder2 (HUBER *et*  
498 *al.* 2016). We reformatted the polarized VCF file to a folded allele frequency file, showing allele counts for  
499 each base. We then used Sweepfinder2 on the total called polymorphism in each population to detect  
500 selective sweeps in 1kbp windows (HUBER *et al.* 2016). We reformatted the results and looked for genes  
501 neighboring or overlapping with regions where selective sweeps have occurred with a high confidence,  
502 shown as peaks above the genomic background. We surveyed for peaks by identifying 1kbp windows in  
503 the 97.5<sup>th</sup> percentile for composite likelihood ratio per chromosome.

504 Using the total VCF with outgroup information, we next calculated Dxy per SNP for all pairwise  
505 population comparisons (NEI AND MILLER 1990), as well as within population pairwise diversity and dS  
506 from the outgroups, using a custom python script. We then found the average Dxy and dS per gene and  
507 looked for gene enrichments in the upper 97.5<sup>th</sup> percentile, versus all other genes.

#### 508 *Inversions*

509 For each sample, we used Delly (RAUSCH *et al.* 2012) to generate a multiple sample VCF file identifying  
510 regions in the genome which are potentially duplicated, deleted or inverted compared to the reference  
511 genome. Then we filtered and removed inversions found in fewer than 1% of individuals and with a GATK

512 VCF quality score lower than 200. We also called inversions using Pindel (YE *et al.* 2009) in these same  
513 samples and again removed low quality inversion calls. We next manually filtered samples and merged  
514 inversions with breakpoints within 1000bp at both ends and significantly overlapping in the  
515 presence/absence of these inversions across strains (using a  $\chi^2$  test,  $p$ -value < 0.05). We also filtered and  
516 removed large inversions which were only found with one of the two tools. Using the remaining filtered  
517 and merged inversions we estimated the frequency of each inversion within the total population.

### 518 *Signatures of recurrent selection*

519 We filtered the total VCF with annotations by SNPeff and retained only non-synonymous (replacement) or  
520 synonymous (silent) SNPs. We then compared these polymorphisms to the differences identified to *D.*  
521 *falleni* and *D. phalerata* to polarize changes to specific branches. Specifically, we sought to determine sites  
522 which are polymorphic in our *D. innubila* populations or are substitutions which fixed along the *D. innubila*  
523 branch of the phylogeny. We used the counts of fixed and polymorphic silent and replacement sites per  
524 gene to estimate McDonald-Kreitman-based statistics, specifically direction of selection (DoS)  
525 (MCDONALD AND KREITMAN 1991; SMITH AND EYRE-WALKER 2002; STOLETZKI AND EYRE-WALKER  
526 2011). We also used these values in SnIPRE (EILERTSON *et al.* 2012), which reframes McDonald-Kreitman  
527 based statistics as a linear model, taking into account the total number of non-synonymous and synonymous  
528 mutations occurring in user defined categories to predict the expected number of these substitutions and  
529 calculate a selection effect relative to the observed and expected number of mutations (EILERTSON *et al.*  
530 2012). We calculated the SnIPRE selection effect for each gene using the total number of mutations on the  
531 chromosome of the focal gene. Using FlyBase gene ontologies (GRAMATES *et al.* 2017), we sorted each  
532 gene into a category of immune gene or classed it as a background gene, allowing a gene to be classed in  
533 multiple immune categories. We fit a GLM to identify functional categories with excessively high estimates  
534 of adaptation, considering multiple covariates:

$$535 \quad \text{Statistic} \sim \text{Population} + \text{Gene group} + (\text{Gene group} * \text{Population}) + \text{Chromosome} \\ 536 \quad \quad \quad + \text{Chromosome:Position}$$

537 We then calculated the difference in each statistic between our focal immune genes and a randomly sampled  
538 nearby (within 100kbp) background gene, finding the average of these differences for each immune  
539 category over 10000 replicates, based on (CHAPMAN *et al.* 2019).

540 To confirm these results, we also used AsymptoticMK (HALLER AND MESSER 2017) to calculate  
541 asymptotic  $\alpha$  for each gene category. We generated the non-synonymous and synonymous site frequency  
542 spectrum for each gene category, which we then used in AsymptoticMK to calculate asymptotic  $\alpha$  and a  
543 95% confidence interval. We then used a permutation test to assess if functional categories of interest  
544 showed a significant difference in asymptotic  $\alpha$  from the rest of categories.

545 **Acknowledgements**

546 This work was completed with helpful discussion from Justin Blumensteil, Joanne Chapman, Richard Glor,  
547 Stuart MacDonald, Maria Orive and Carolyn Wessinger. We would especially like to thank Kelly Dyer and  
548 Paul Guinsberg for proposing the idea of the manuscript and providing feedback on early sections of the  
549 manuscript. We greatly appreciate help provided by John Kelly, for providing scripts to calculate  $D_{XY}$  as  
550 well as advice on population genetic inference and comments on the manuscript. Collections were  
551 completed with assistance from Todd Schlenke and the Southwest Research Station. We thank Brittny Smith  
552 and the KU CMADP Genome Sequencing Core (NIH Grant P20 GM103638) for assistance in genome  
553 isolation, library preparation and sequencing. This work was supported by a K-INBRE postdoctoral grant  
554 to TH (NIH Grant P20 GM103418). This work was also funded by NIH Grants R00 GM114714 and R01  
555 AI139154 to RLU.

## 556 **Supplementary Methods**

557 We used dnaPipeTE (GOUBERT *et al.* 2015) to quantify the extent that repetitive element content differed  
558 across the populations. Our approach assumed a genome size of 168Mbp, with the number of randomly  
559 sampled reads equal to 1-fold coverage of the genome, resampling each strain 2 times to get the average  
560 estimate of each strains TE content. Following TE identification, we grouped sequences by known super-  
561 families and compared the proportion of the genome composed of each superfamily across strains in the  
562 populations. We also used a reciprocal blast (e-value < 0.00000001) (ALTSCHUL *et al.* 1990) to identify TE  
563 families present in each strain.

564 We confirmed TE families shared between the previous RepeatModeler (SMIT AND HUBLEY 2008)  
565 annotation of the *D. innubila* reference genome and the dnaPipeTE annotation using blast (e-value < 10e-  
566 08) (ALTSCHUL *et al.* 1990). After confirming that they did not differ in content, we called TE insertions in  
567 each strain across the genome using PopoolationTE2 (KOFLENER *et al.* 2016), then merged the output and  
568 calculated the frequency of insertions, grouping by TE order, population and if the insertion was exonic,  
569 intronic, non-coding or flanking a gene (500bp up or downstream of start or end). When considering  
570 individual TE families in *D. innubila*, we used the RepBase TE names and identifications (BAO *et al.* 2015).

## 571 **Supplementary Results**

572 We characterized the repetitive content across our samples using dnaPipeTE (GOUBERT *et al.* 2015) and  
573 called TE insertions per line using PopoolationTE2 (KOFLENER *et al.* 2016). The reference *D. innubila* genome  
574 contains 154 different TE families along with varying satellites and simple repeats, with resequenced  
575 individuals varying from 4.4% to 38.4% of reads matching repetitive sequences. Strains varied from 1913  
576 to 7479 TE insertions per strain in the non-repetitive portion of the genome. Like nuclear polymorphism,  
577 we find little population structure by shared TE insertions, though strains do seem to disperse primarily by  
578 the number of insertions (Supplementary Figure 11B).

579 Similar to *D. melanogaster* (CHARLESWORTH AND LANGLEY 1989; CHARLESWORTH *et al.* 1997;  
580 PETROV *et al.* 2011; KOFLENER *et al.* 2012; KOFLENER *et al.* 2015), *D. innubila* harbors a significant excess of  
581 low frequency TE insertions compared to the SFS of synonymous variants (Supplementary Figure 11A,  
582 GLM Count ~ Frequency \* SNP or TE, t-value = -16.401, p-value = 1.889e-60), with no difference in the  
583 insertion frequency spectra between populations (GLM Count ~ Frequency \* TE order \* Population, t-  
584 value = -0.341, p-value = 0.733). This implies in every population, TE insertions are on average mildly  
585 deleterious and removed via purifying selection.

586 Using dnaPipeTE (GOUBERT *et al.* 2015), we find a significantly higher density of RC & TIR  
587 elements compared to other repeat orders (Supplementary Figure 11C, t-value = 3.555 p-value = 3.745e-  
588 04), consistent with the reference genome (HILL *et al.* 2019). The density of repetitive content is also higher

589 genome wide in the CH and PR populations compared to HU and SR (Supplementary Figure 11C & D, t-  
590 value = 2.856, p-value = 4.291e-03). This is in keeping with a more recent bottleneck for these species  
591 reducing effective population size and efficacy of selection, resulting in bursts of repeat activity with  
592 relaxed selection for removal of insertions. These changes are primarily driven by an expansion of simple  
593 repeats in the CH population (Supplementary Figure 11D, GLM t-value = 3.978, p-value = 7.31e-05) and  
594 an expansion of TIR elements in the PR population (Supplementary Figure 11D, GLM t-value = 3.914, p-  
595 value = 9.52e-05). Specifically, we see expansions of the satellite CASAT\_HD (GLM t-value = 5.554, p-  
596 value = 8.832e-08) and the simple repeat sequences CAACAA, CTC and GTGT in the CH population when  
597 compared to all other populations (GLM t-value = 9.204, p-value = 2.555e-17). In the PR population we  
598 find significantly higher abundances of a TE families closely related to *Tetris\_Dvir* (GLM t-value = 13.641,  
599 p-value = 2.889e-32), *Helitron-2N1\_DVir* (GLM t-value = 12.381, p-value = 2.789e-28) and *Chapaev3-*  
600 *I\_PM* (GLM t-value = 11.472, p-value = 1.662e-24) compared to other populations. We do not find any  
601 evidence that particular TE orders are more abundant on any one chromosome in *D. innubila* (GLM t-value  
602 = 1.854, p-value = 0.633), though do find TEs are at significantly higher insertion densities in the inverted  
603 regions of Muller element A than at the regions of the genome (Wilcoxon Rank Sum Test W= 19763, p-  
604 value = 0.01488). This suggests the lack of recombination in the inverted region is allowing the  
605 accumulation of repetitive content on Muller element A.

606 TE insertions are usually assumed to be at least mildly deleterious (CHARLESWORTH AND LANGLEY  
607 1989; PETROV *et al.* 2011). In *D. innubila*, TE density is lower in regions flanking genes or within genes  
608 compared to non-coding regions (GLM t-value = -6.538, p-value = 6.23e-11), consistent with the  
609 deleterious assumption. However, the frequency of TE insertions was significantly higher in exonic regions  
610 compared to introns and UTRs (Supplementary Figure 11A, GLM t-value = 4.040, p-value = 5.34e-05),  
611 across all populations, which we may have observed as these are wild caught flies and so may have more  
612 recessive deleterious insertions segregating in the population than are seen in inbred samples. Overall the  
613 repetitive content in *Drosophila innubila* appears to be mildly deleterious, with TE insertions shared  
614 between locations by migration. Despite this there are some major differences in the repeat content of each  
615 population, possibly due to the stochastic effect of population bottlenecks.

616 This may have occurred due to a founder effect following the population bottleneck, where a  
617 majority of CH founders by chance had a higher proportion of particular satellites or simple repeats  
618 (CHARLESWORTH *et al.* 2003), but this is unlikely given the gene flow between populations. Alternatively,  
619 the bottleneck could have fixed segregating recessive variation which limits the regulation of repetitive  
620 content in the genome, leading to its expansion. However, if this was the case and satellite expansion is  
621 even mildly deleterious, we would expect migratory rescue of repeat regulation machinery. A third

622 possibility is that satellite expansion is associated with local evolutionary dynamics either involved in  
623 adaptation or genetic conflict (GARRIDO-RAMOS 2017; LOWER *et al.* 2018).

624 **Supplementary Figure 1: A.** Population size history of *Drosophila innubila* backwards in time for each  
625 population. **B.** Population size history on the Log10 scale of *Drosophila innubila* backwards in time for  
626 each population. **C.** Results of Structure software (FALUSH *et al.* 2003) for estimating population structure  
627 between locations for 100,000 sampled synonymous polymorphisms from all autosomes, with a K=3  
628 (estimated optimal K value). Note that this plot summarizes all autosomes (excluding Muller B) and the X  
629 chromosome due to very little structure between locations for all chromosomes. **D.** Results of Structure  
630 software (FALUSH *et al.* 2003) for estimating population structure between locations for 16  
631 polymorphisms on the autosomes, with a K=3 (estimated optimal K value).

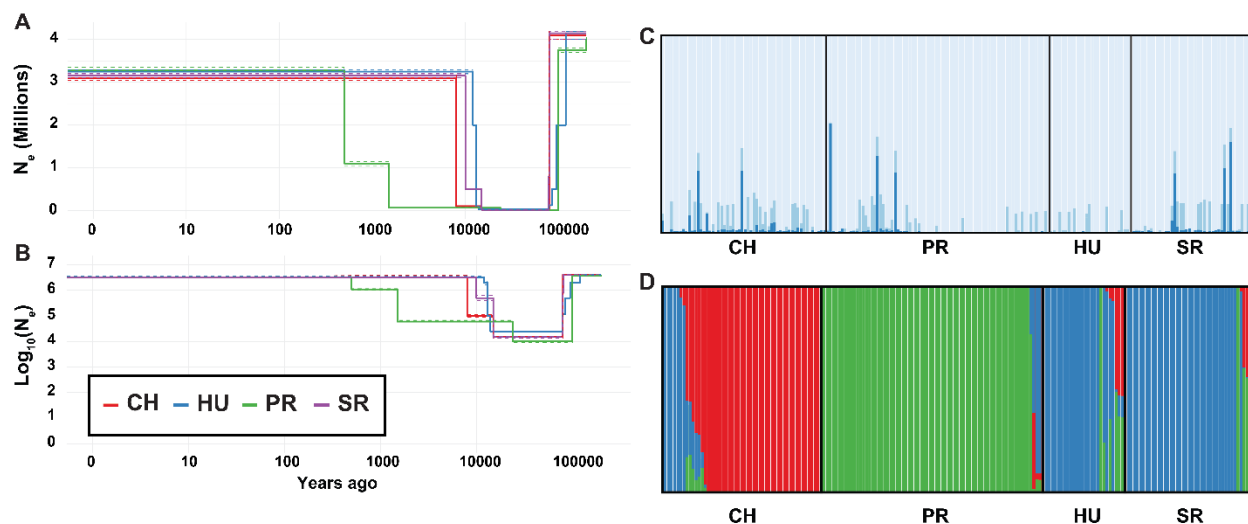

632

633



634 **Supplementary Figure 2:**  $F_{st}$  by gene across all Muller elements for each population, located by loci (in  
635 bp) on the Muller element.

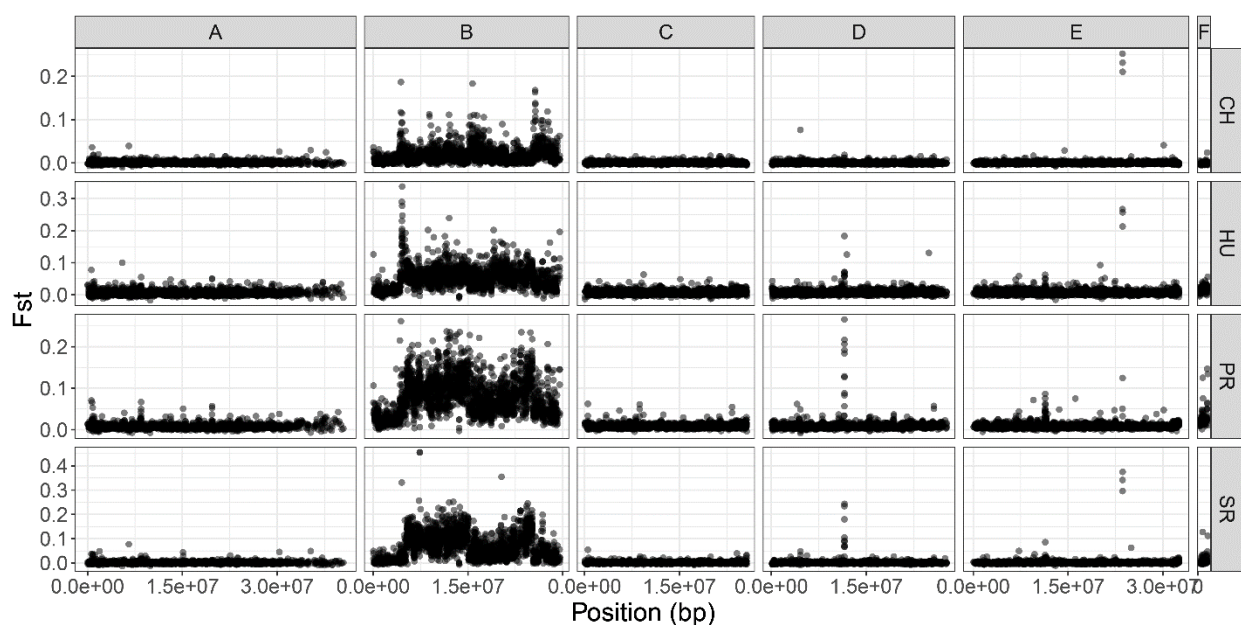

636  
637 **Supplementary Figure 3:** Tajima's D by gene across all Muller elements for each population, located by  
638 loci (in bp) on the Muller element. The grey dashed line shows a Tajima's D of 0.

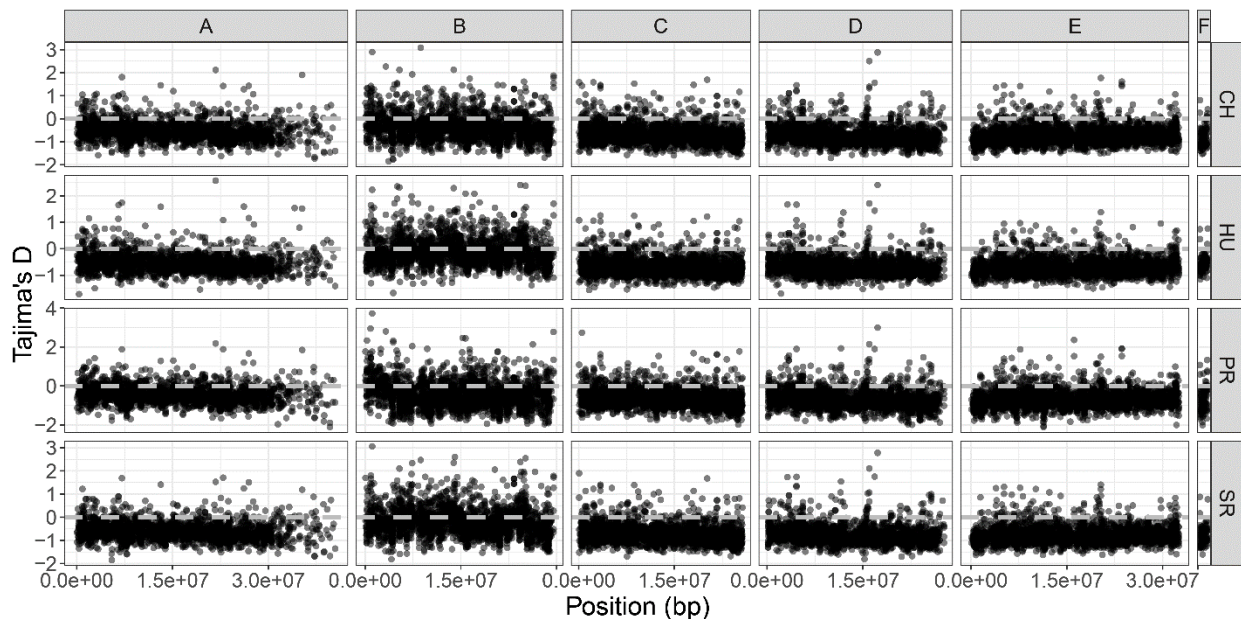

639  
640

641 **Supplementary Figure 4:** Population genetic statistics (Pairwise diversity, Tajima's D and Fst) for genes  
642 in each immune category, for each population. Each plot has a dotted line to show the genomic background  
643 statistics for each population. The Tajima's D plot contains a dashed line to show 0.  
644

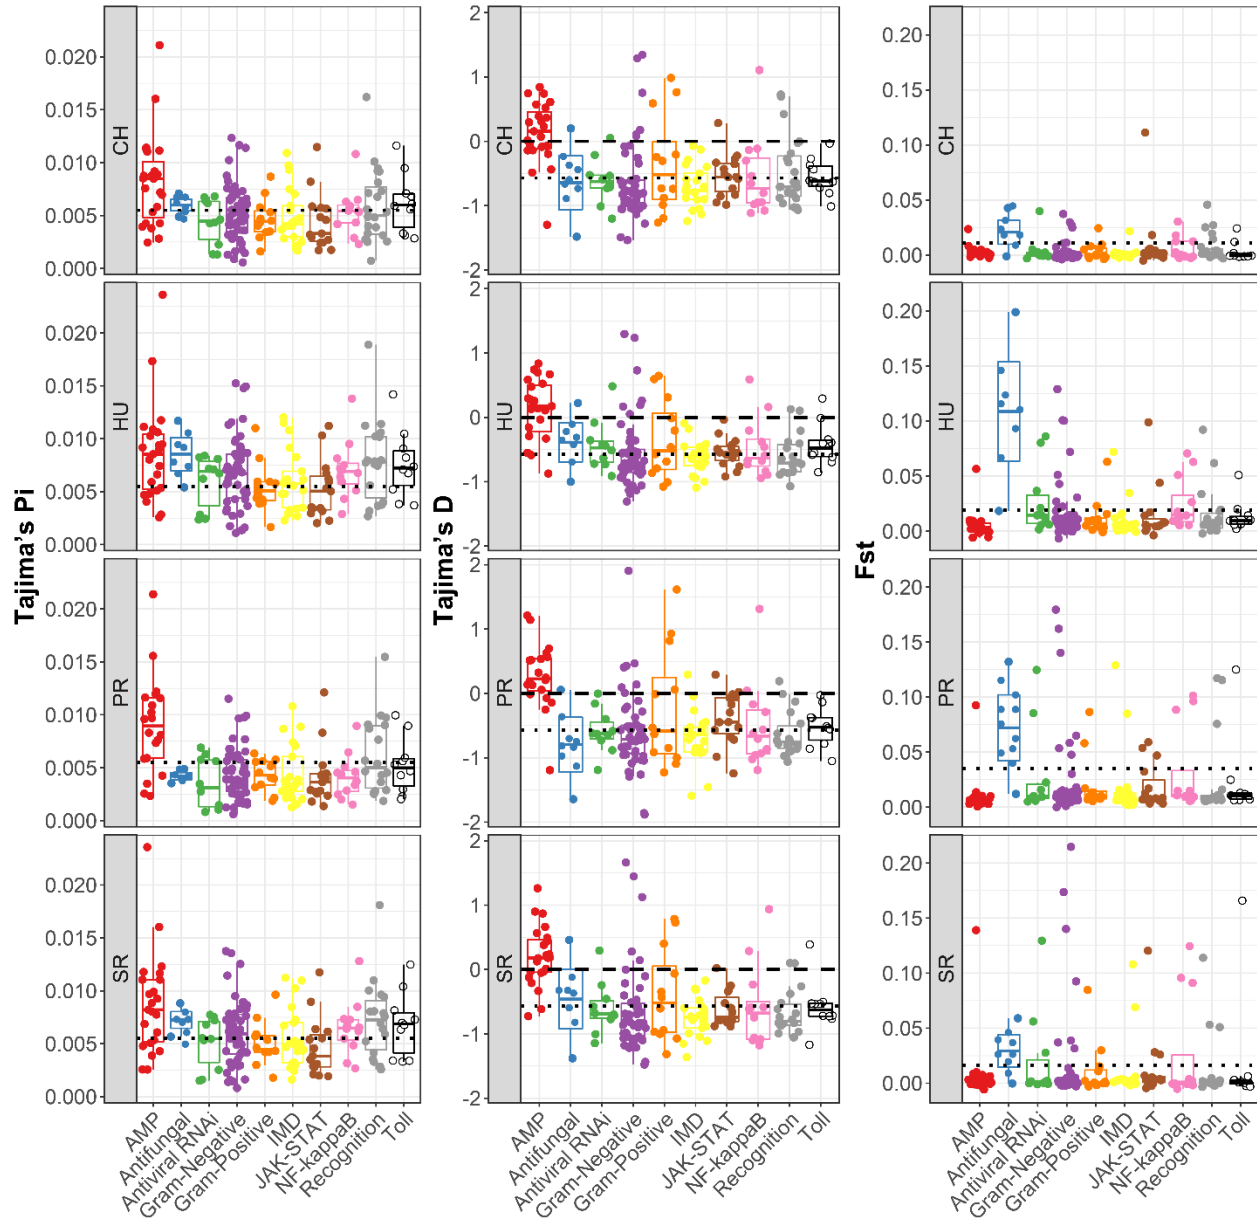

645

646

647 **Supplementary Figure 5:** Mean copy number per population for genes of interest in  $F_{ST}$  peaks.

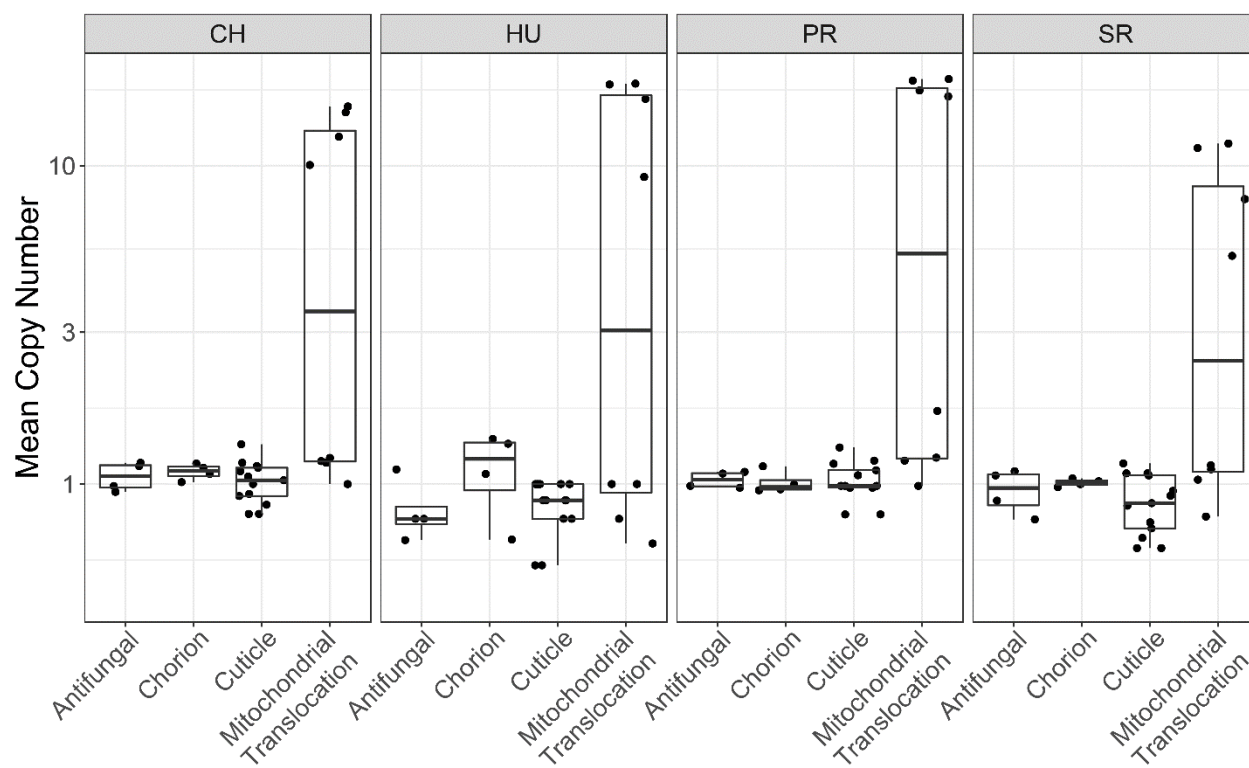

648

649

650 **Supplementary Figure 6: A.** Within population pairwise diversity per gene across the *D. innubila* genome.  
651 **B.**  $D_{XY}$  per gene for each population. Instead of showing all pairwise comparisons, we show one randomly  
652 chosen comparison for each population, due to no significant differences between comparisons.

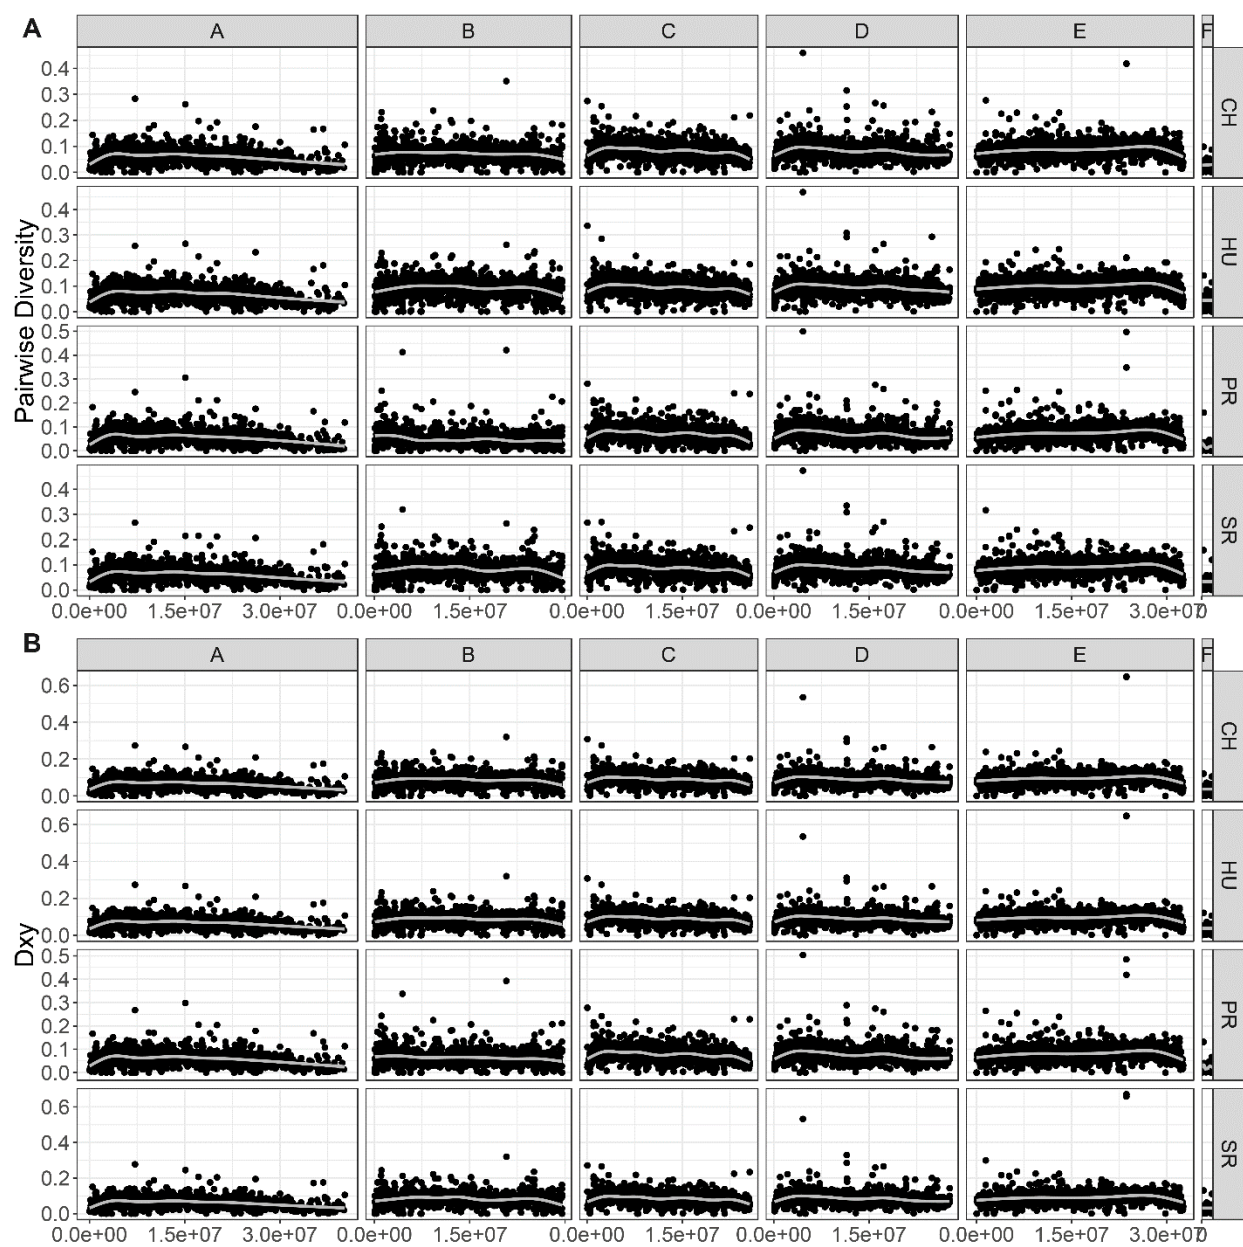

653  
654

655 **Supplementary Figure 7:** Composite likelihood score for a selective sweep in 1kbp windows of the  
656 genome estimated using Sweepfinder2. Separated by chromosome and population. **A.** Genome wide  
657 composite likelihood score. **B.** Focus on 18.5-19Mbp of Muller element D, to show strongest selective  
658 sweep in each the PR population.

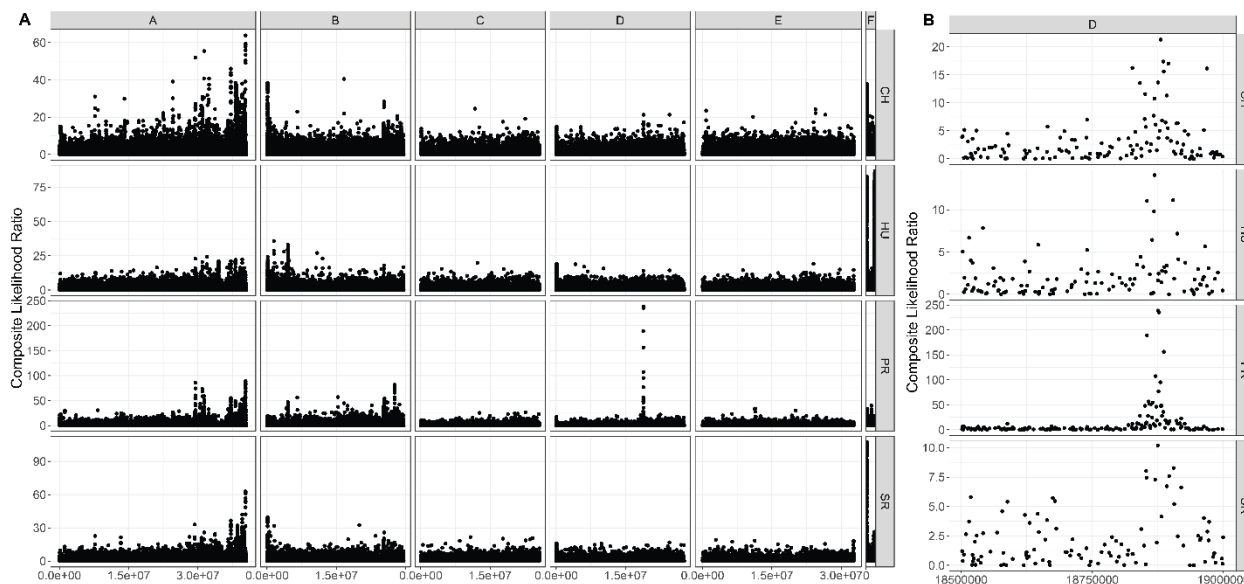

659 **Supplementary Figure 8:**  $F_{st}$  of genes between CH samples from 2001 and 2017, by chromosome and  
660 position. Also shows  $F_{st}$  between all males and females from 2017, by chromosome and position.  
661

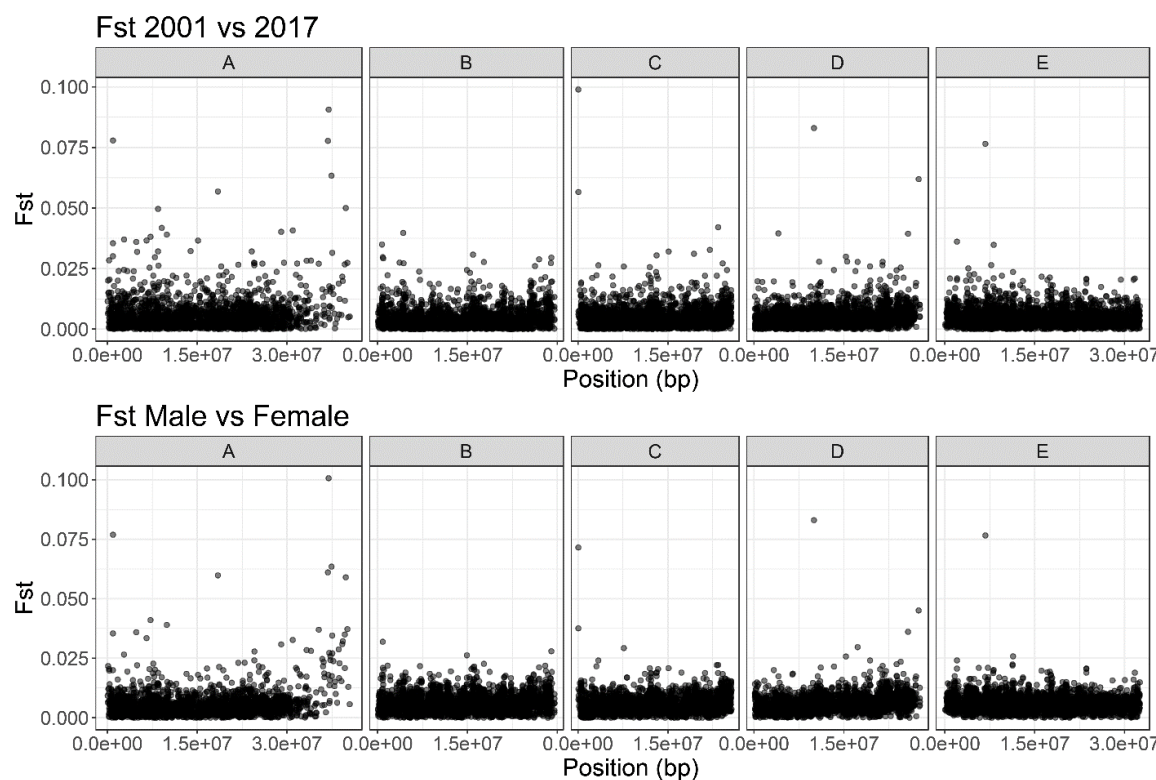

662

663 **Supplementary Figure 9:** Minor allele frequency difference curve across the genome (averaged over 2000  
664 SNPs, sliding 1000 SNPs). Shows average difference in the minor allele frequencies (based on total 2017  
665 sample). Comparisons between 2001 Chiricahua and 2017 Chiricahua, and between all 2017 males and  
666 2017 female samples.

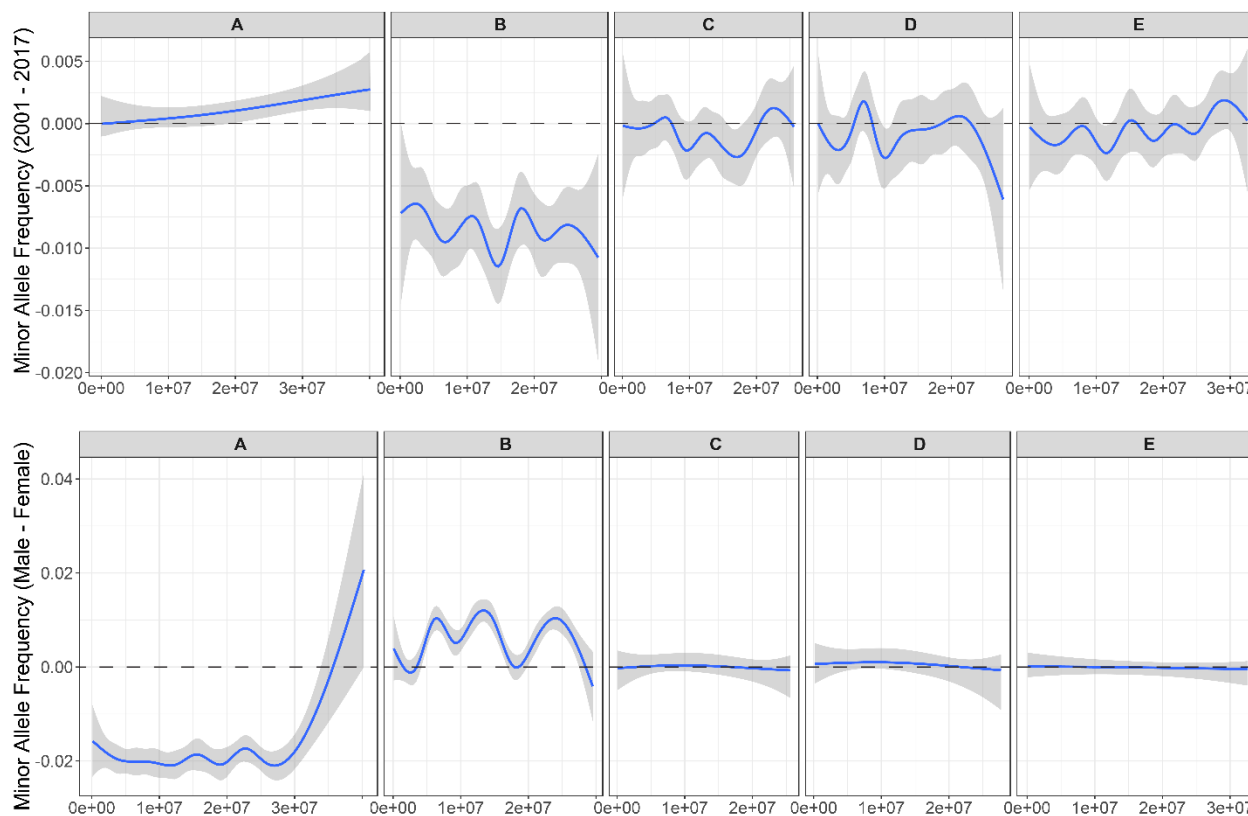

667

668 **Supplementary Figure 10:** Asymptotic  $\alpha$  for immune categories, cuticle development proteins and all  
669 proteins, with 95% confidence intervals for categories. Categories marked with a \* are significantly higher  
670 than the background following a permutation test ( $<0.05$ ). 0 is marked with a dashed line. In the 'All'  
671 category, the median and 95% confidence interval is calculated across all functional categories, while in  
672 the specific functional categories the 95% confidence intervals for Asymptotic  $\alpha$  are calculated using  
673 AsymptoticMK (MESSER AND PETROV 2012; HALLER AND MESSER 2017).

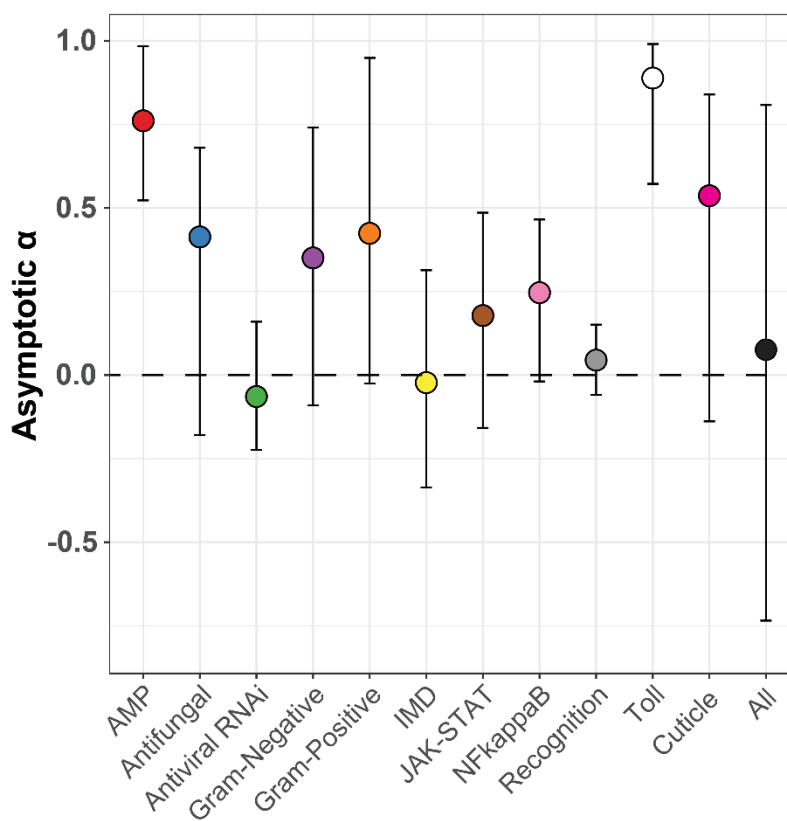

674  
675 **Supplementary Figure 11:** The transposable element content of *Drosophila innubila*. **A.** Insertion  
676 frequency spectra for TEs in *D. innubila* separated by TE order and the location of insertion (e.g. coding  
677 region, non-coding, intronic). **B.** Principle component analysis (showing PCs 1 & 2) of TE insertions  
678 across *D. innubila* strains shows little population structure. Strains are labelled by their population (both  
679 shape and color). **C.** Mean TE insertion density per 1Mb window (sliding 1Mb) for each population of *D.*  
680 *innubila*, identified using PopoolationTE2. TE insertions are colored by their order. **D.** Proportion of the  
681 genome made up of repetitive content for each strain, as found with dnaPipeTE. Strains are ordered by  
682 total TE content from most to least, with bars colored by TE order.

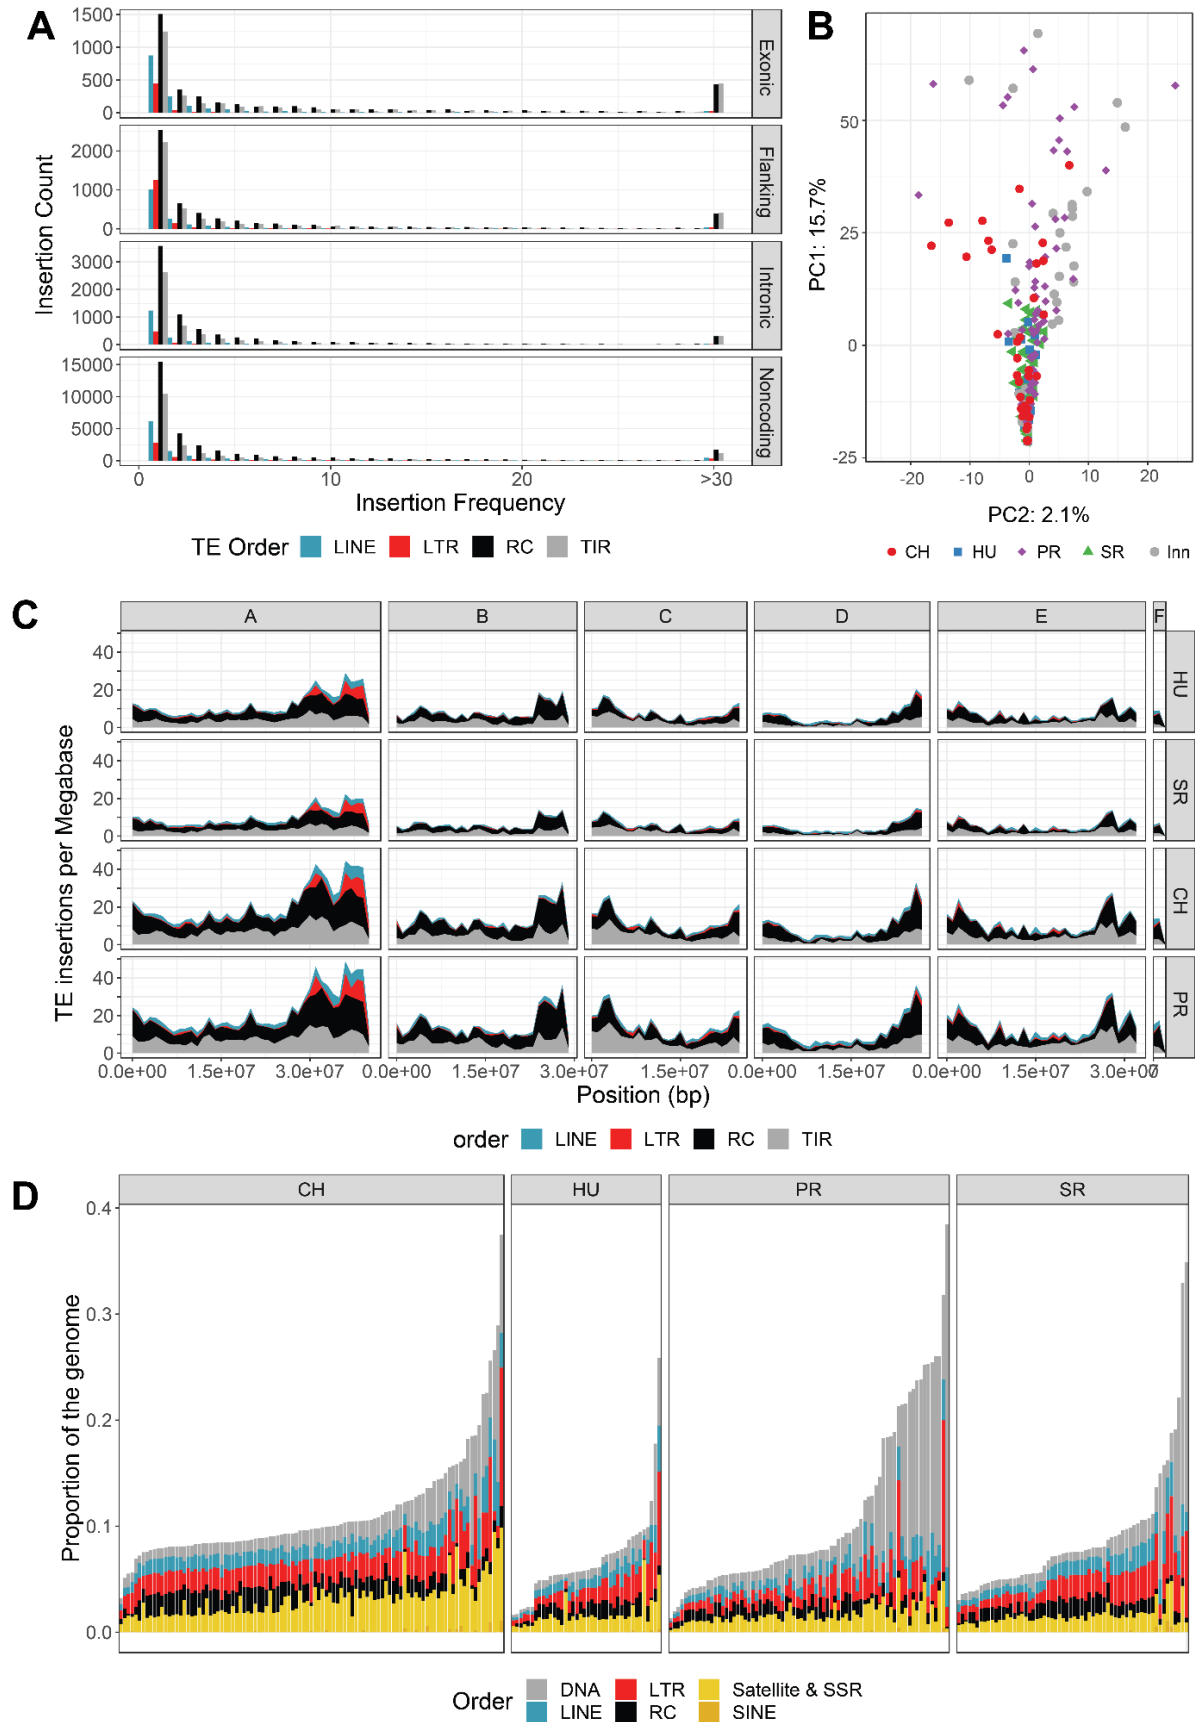



684 **Supplementary Table 1:** Summary of *Drosophila innubila* fly's DNA collected and sequenced for this  
685 study, including summary of coverage for X chromosome, autosomes. Also contains SRA accessions for  
686 each strain.

687 **Supplementary Table 2:** GLM for population genetic statistics in immune gene categories relative to the  
688 background for each population.

689 **Supplementary Table 3:** Summary of gene ontology enrichments for  $F_{ST}$  in each population, separated  
690 by processes, components and functions.

691 **Supplementary Table 4:** Summary of GLM for elevated McDonald-Kreitman statistics GO categories in  
692 *D. innubila*.

693 **Supplementary Table 5:** Summary of gene ontology enrichments for  $D_{XY}$  in each population.

694 **Supplementary Data 1:** VCF file for SNPs in *D. innubila*, used in estimation of population genetic  
695 statistics and in GWAS.

696 **Supplementary Data 2:** Population genetic statistics calculated for each gene in *D. innubila* using  
697 VCFtools for each population.

698 **Supplementary Data 3:** McDonald-Kreitman statistics calculated for each gene in *D. innubila* using  
699 SnIPRE for each population.

700

## 701 **Bibliography**

702 Altschul, S. F., W. Gish, W. Miller, E. W. Myers and D. J. Lipman, 1990 Basic local alignment  
703 search tool. *Journal of Molecular Biology* 215: 403-410.

704 Antunes, J. T., P. N. Leao and V. M. Vasconcelos, 2015 *Cylindrospermopsis raciborskii*: review  
705 of the distribution, phylogeography, and ecophysiology of a global invasive species.  
706 *Frontiers in Microbiology* 6: 473.

707 Arechederra-Romero, L., 2012 Southwest Fire Science Consortium Field Trip to the Chiricahua  
708 National Monument: Discussion of the Impacts of the 2011 Horseshoe 2 Fire, pp. in  
709 *Arizona Geology Magazine*, Arizona Geology Magazine.

710 Astanei, I., E. Gosling, J. Wilson and E. Powell, 2005 Genetic variability and phylogeography of  
711 the invasive zebra mussel, *Dreissena polymorpha* (Pallas). *Mol Ecol* 14: 1655-1666.

712 Avgar, T., G. Street, and J. M. Fryxell, 2014 On the adaptive benefits of mammal migration.  
713 *Canadian Journal of Zoology* 92: 481-490.

714 Bao, W., K. K. Kojima and O. Kohany, 2015 Repbase Update, a database of repetitive elements  
715 in eukaryotic genomes. *Mobile DNA* 6: 4-9.

716 Behrman, E. L., S. S. Watson, K. R. O'Brien, S. M. Heschel and P. S. Schmidt, 2015 Seasonal  
717 variation in life history traits in two *Drosophila* species. *Journal of Evolutionary Biology*  
718 28: 1691-1704.

719 Buffalo, V., 2018 *Scythe*.

720 Burt, A., and R. Trivers, 2006 *Genes in Conflict*.

721 Chakraborty, M., R. Zhao, X. Zhang, S. Kalsow and J. J. Emerson, 2017 Extensive hidden genetic  
722 variation shapes the structure of functional elements in *Drosophila*. *Doi.Org* 50: 114967.

- 723 Chapman, J. R., T. Hill and R. L. Unckless, 2019 Balancing selection drives maintenance of  
724 genetic variation in *Drosophila* antimicrobial peptides. *Genome Biology and Evolution* 11:  
725 2691-2701.
- 726 Charlesworth, B., D. Charlesworth and N. H. Barton, 2003 The Effects of Genetic and Geographic  
727 Structure on Neutral Variation. *Annual Review of Ecology, Evolution, and Systematics*  
728 34: 99-125.
- 729 Charlesworth, B., and C. H. Langley, 1989 The population genetics of *Drosophila* transposable  
730 elements. *Annual review of genetics* 23: 251-287.
- 731 Charlesworth, B., C. H. Langley and P. D. Sniegowski, 1997 Transposable element distributions  
732 in *Drosophila*. *Genetics* 147: 1993-1995.
- 733 Chen, X., O. Schulz-Trieglaff, R. Shaw, B. Barnes, F. Schlesinger *et al.*, 2016 Manta: Rapid  
734 detection of structural variants and indels for germline and cancer sequencing applications.  
735 *Bioinformatics* 32: 1220-1222.
- 736 Cingolani, P., A. Platts, L. L. Wang, M. Coon, T. Nguyen *et al.*, 2012 A program for annotating  
737 and predicting the effects of single nucleotide polymorphisms, SnpEff: SNPs in the genome  
738 of *Drosophila melanogaster* strain w1118; iso-2; iso-3. *Fly* 6: 80-92.
- 739 Cini, A., C. Ioriatti and G. Anfora, 2012 A review of the invasion of *Drosophila suzukii* in Europe  
740 and a draft research agenda for integrated pest management. *Bulletin of Insectology* 65:  
741 149-160.
- 742 Cloudsley-Thompson, J. L., 1978 Human Activities and Desert Expansion. *The Geographical*  
743 *Journal* 144: 416-423.
- 744 Coe, S. J., D. M. Finch and M. M. Friggens, 2012 An Assessment of Climate Change and the  
745 Vulnerability of Wildlife in the Sky Islands of the Southwest, pp. 1-208. United States  
746 Department of Agriculture.
- 747 Cruickshank, T. E., and M. W. Hahn, 2014 Reanalysis suggests that genomic islands of speciation  
748 are due to reduced diversity, not reduced gene flow. *Mol Ecol* 23: 3133-3157.
- 749 Cutter, A. D., and B. A. Payseur, 2013 Genomic signatures of selection at linked sites: unifying  
750 the disparity among species. *Nat Rev Genet* 14: 262-274.
- 751 Danecek, P., A. Auton, G. Abecasis, C. A. Albers, E. Banks *et al.*, 2011 The variant call format  
752 and VCFtools. *Bioinformatics* 27: 2156-2158.
- 753 DePristo, M. A., E. Banks, R. Poplin, K. V. Garimella, J. R. Maguire *et al.*, 2011 A framework for  
754 variation discovery and genotyping using next-generation DNA sequencing data. *Nature*  
755 *genetics* 43: 491-498.
- 756 Dobzhansky, T., and B. Spassky, 1968 The Genetics of Natural Populations XL: Heterotic and  
757 Deleterious Effects of Recessive Lethals in Populations of *Drosophila pseudoobscura*.  
758 *Genetics* 59: 411-425.
- 759 Dobzhansky, T., and A. H. Sturtevant, 1937 Inversions In Chromosomes of *Drosophila*  
760 *pseudoobscura*. *Genetics* 23: 28-64.
- 761 Dobzhansky, T. H., A. S. Hunter, O. Pavlovsky, B. Spassky and B. Wallace, 1963 Genetics of  
762 natural populations. XXXI. Genetics of an isolated marginal population of *Drosophila*  
763 *pseudoobscura*. *Genetics* 48: 91-103.
- 764 Dostert, C., E. Jouanguy, P. Irving, L. Troxler, D. Galiana-Arnoux *et al.*, 2005 The Jak-STAT  
765 signaling pathway is required but not sufficient for the antiviral response of *Drosophila*.  
766 *Nat Immunol* 6: 946-953.

- 767 Dyer, K. A., 2004 Evolutionarily Stable Infection by a Male-Killing Endosymbiont in *Drosophila*  
768 *innubila*: Molecular Evidence From the Host and Parasite Genomes. *Genetics* 168: 1443-  
769 1455.
- 770 Dyer, K. a., and J. Jaenike, 2005 Evolutionary dynamics of a spatially structured host-parasite  
771 association: *Drosophila innubila* and male-killing *Wolbachia*. *Evolution; international*  
772 *journal of organic evolution* 59: 1518-1528.
- 773 Dyer, K. A., M. S. Minhas and J. Jaenike, 2005 Expression and modulation of embryonic male-  
774 killing in *Drosophila innubila*: opportunities for multilevel selection. *Evolution;*  
775 *international journal of organic evolution* 59: 838-848.
- 776 Eilertson, K. E., J. G. Booth and C. D. Bustamante, 2012 SnIPRE: Selection Inference Using a  
777 Poisson Random Effects Model. *PLoS Computational Biology* 8.
- 778 Excoffier, L., M. Foll and R. J. Petit, 2009 Genetic Consequences of Range Expansions. *Annual*  
779 *Review of Ecology, Evolution, and Systematics* 40: 481-501.
- 780 Falush, D., M. Stephens and J. K. Pritchard, 2003 Inference of population structure using  
781 multilocus genotype data: Linked loci and correlated allele frequencies. *Genetics* 164:  
782 1567-1587.
- 783 Fricot, E., F. Mathieu, T. Trouillon, G. Bouchard and O. François, 2014 Fast and efficient  
784 estimation of individual ancestry coefficients. *Genetics* 196: 973-983.
- 785 Fuller, Z. L., G. D. Haynes, S. Richards and S. W. Schaeffer, 2016 Genomics of Natural  
786 Populations: How Differentially Expressed Genes Shape the Evolution of Chromosomal  
787 Inversions in. *Genetics*.
- 788 Gao, Z., D. Waggoner, M. Stephens, C. Ober and M. Przeworski, 2015 An estimate of the average  
789 number of recessive lethal mutations carried by humans. *Genetics* 199: 1243-1254.
- 790 Garrido-Ramos, M. A., 2017 Satellite DNA: An Evolving Topic. *Genes (Basel)* 8.
- 791 Gillespie, J., 2004 *Population Genetics: A Concise Guide*. 232.
- 792 Goubert, C., L. Modolo, C. Vieira, C. V. Moro, P. Mavingui *et al.*, 2015 De novo assembly and  
793 annotation of the Asian tiger mosquito (*Aedes albopictus*) repeatome with dnaPipeTE from  
794 raw genomic reads and comparative analysis with the yellow fever mosquito (*Aedes*  
795 *aegypti*). *Genome Biology and Evolution* 7: 1192-1205.
- 796 Gramates, L. S., S. J. Marygold, G. Dos Santos, J. M. Urbano, G. Antonazzo *et al.*, 2017 FlyBase  
797 at 25: Looking to the future. *Nucleic Acids Research* 45: D663-D671.
- 798 Guindon, S., J.-F. Dufayard, V. Lefort, M. Anisimova, W. Hordijk *et al.*, 2010 New algorithms  
799 and methods to estimate maximum-likelihood phylogenies: assessing the performance of  
800 PhyML 3.0. *Systematic biology* 59: 307-321.
- 801 Haller, B. C., and P. W. Messer, 2017 asymptoticMK: A Web-Based Tool for the Asymptotic  
802 McDonald–Kreitman Test. *G3: Genes, Genomes, Genetics* 7: 1569-1575.
- 803 Hermisson, J., and P. S. Pennings, 2005 Soft sweeps: molecular population genetics of adaptation  
804 from standing genetic variation. *Genetics* 169: 2335-2352.
- 805 Hewitt, G., 2000 The genetic legacy of the Quaternary ice ages. *Nature* 405: 907-913.
- 806 Hill, T., B. Koseva and R. L. Unckless, 2019 The genome of *Drosophila innubila* reveals lineage-  
807 specific patterns of selection in immune genes. *Molecular Biology and Evolution*: 1-36.
- 808 Hoban, S., J. L. Kelley, K. E. Lotterhos, M. F. Antolin, G. Bradburd *et al.*, 2016 Finding the  
809 Genomic Basis of Local Adaptation: Pitfalls, Practical Solutions, and Future Directions.  
810 *Am Nat* 188: 379-397.
- 811 Hoffmann, J. A., 2003 The immune response of *Drosophila*. *Nature* 426: 33-38.

- 812 Holmgren, K., J. A. Lee-Thorp, G. R. J. Cooper, K. Lundblad, T. C. Partridge *et al.*, 2003 Persistent  
813 millennial-scale climatic variability over the past 25,000 years in Southern Africa.  
814 Quaternary Science Reviews 22: 2311-2326.  
815 [Http://broadinstitute.github.io/picard](http://broadinstitute.github.io/picard), Picard.
- 816 Huber, C. D., M. DeGiorgio, I. Hellmann and R. Nielsen, 2016 Detecting recent selective sweeps  
817 while controlling for mutation rate and background selection. Mol Ecol 25: 142-156.
- 818 Imler, J., and I. Elfttherianos, 2009 *Drosophila* as a model for studying antiviral defences. Insect  
819 infection and immunity (eds Rolff J., Reynolds SE): 49-68.
- 820 Jaenike, J., and K. A. Dyer, 2008 No resistance to male-killing *Wolbachia* after thousands of years  
821 of infection. Journal of Evolutionary Biology 21: 1570-1577.
- 822 Joshi, N., and J. Fass, 2011 Sickie: A sliding window, adaptive, quality-based trimming tool for  
823 fastQ files. 1.33.
- 824 Kageyama, D., H. Anbutsu, M. Shimada and T. Fukatsu, 2009 Effects of host genotype against  
825 the expression of spiroplasma-induced male killing in *Drosophila melanogaster*. Heredity  
826 (Edinb) 102: 475-482.
- 827 Kofler, R., A. J. Betancourt and C. Schlötterer, 2012 Sequencing of pooled DNA Samples ( Pool-  
828 Seq ) uncovers complex dynamics of transposable element insertions in *Drosophila*  
829 *melanogaster*. PLoS Genetics 8: 1-16.
- 830 Kofler, R., G. Daniel and C. Schlötterer, 2016 PoPoolationTE2 : comparative population genomics  
831 of transposable elements using Pool-Seq. Molecular Biology and Evolution: 1-12.
- 832 Kofler, R., V. Nolte and C. Schlötterer, 2015 Tempo and mode of transposable element activity in  
833 *Drosophila*. PLoS Genet 11: e1005406.
- 834 Korneliussen, T. S., A. Albrechtsen and R. Nielsen, 2014 ANGSD: Analysis of Next Generation  
835 Sequencing Data. BMC Bioinformatics 15: 356.
- 836 Lachaise, D., and J.-F. Silvain, 2004 How two Afrotropical endemics made two cosmopolitan  
837 human commensals: the *Drosophila melanogaster*-*D. simulans* palaeogeographic riddle.  
838 Genetica 120: 17-39.
- 839 Lack, J. B., C. M. Cardeno, M. W. Crepeau, W. Taylor, R. B. Corbett-Detig *et al.*, 2015 The  
840 *Drosophila* genome nexus: A population genomic resource of 623 *Drosophila*  
841 *melanogaster* genomes, including 197 from a single ancestral range population. Genetics  
842 199: 1229-1241.
- 843 Li, H., and R. Durbin, 2009 Fast and accurate short read alignment with Burrows-Wheeler  
844 transform. Bioinformatics (Oxford, England) 25: 1754-1760.
- 845 Li, H., and R. Durbin, 2011 Inference of human population history from individual whole-genome  
846 sequences. Nature 475: 493-496.
- 847 Li, H., B. Handsaker, A. Wysoker, T. Fennell, J. Ruan *et al.*, 2009 The sequence alignment/map  
848 format and SAMtools. Bioinformatics (Oxford, England) 25: 2078-2079.
- 849 Liu, X., and Y.-X. Fu, 2015 Exploring population size changes using SNP frequency spectra.  
850 Nature genetics 47: 555-559.
- 851 Lower, S. S., M. P. McGurk, A. G. Clark and D. A. Barbash, 2018 Satellite DNA evolution: old  
852 ideas, new approaches. Curr Opin Genet Dev 49: 70-78.
- 853 Ma, X., J. L. Kelley, K. Eilertson, S. Musharoff, J. D. Degenhardt *et al.*, 2013 Population Genomic  
854 Analysis Reveals a Rich Speciation and Demographic History of Orangutans (*Pongo*  
855 *pygmaeus* and *Pongo abelii*). PLoS ONE 8.

- 856 Machado, C. a., T. S. Haselkorn and M. a. F. Noor, 2007 Evaluation of the genomic extent of  
857 effects of fixed inversion differences on intraspecific variation and interspecific gene flow  
858 in *Drosophila pseudoobscura* and *Drosophila persimilis*. *Genetics* 175: 1289-1306.
- 859 Machado, H. E., A. O. Bergland, K. R. O'Brien, E. L. Behrman, P. S. Schmidt *et al.*, 2015  
860 Comparative population genomics of latitudinal variation in *D. simulans* and *D.*  
861 *melanogaster*. *Molecular Ecology*: n/a-n/a.
- 862 Mackay, T. F. C., S. Richards, E. a. Stone, A. Barbadilla, J. F. Ayroles *et al.*, 2012 The *Drosophila*  
863 *melanogaster* genetic reference panel. *Nature* 482: 173-178.
- 864 Marinkovic, D., 1967 Genetic Loads Affecting Fecundity in Natural Populations of *Drosophila*  
865 *pseudoobscura*. *Genetics*: 61-71.
- 866 Markow, T. A., and P. O'Grady, 2006 *Drosophila*: a guide to species identification.
- 867 Martin, M., 2011 Cutadapt removes adapter sequences from high-throughput sequencing reads.  
868 *Technical Notes*: 1-12.
- 869 Marzo, M., M. Puig and A. Ruiz, 2008 The Foldback-like element Galileo belongs to the P  
870 superfamily of DNA transposons and is widespread within the *Drosophila* genus.  
871 *Proceedings of the National Academy of Sciences of the United States of America* 105:  
872 2957-2962.
- 873 Matthey-Doret, R., and M. C. Whitlock, 2018 Background selection and the statistics of population  
874 differentiation: consequences for detecting local adaptation. *Biorxiv*: 1-5.
- 875 McCormack, J. E., H. Huang and L. L. Knowles, 2009 Sky Islands, pp. 841-843 in *Encyclopedia*  
876 *of islands*.
- 877 McDonald, J. H., and M. Kreitman, 1991 Adaptive protein evolution at the Adh locus in  
878 *Drosophila*. *Nature* 351: 652-654.
- 879 McKenna, A., M. Hanna, E. Banks, A. Sivachenko, K. Cibulskis *et al.*, 2010 The Genome Analysis  
880 Toolkit: A MapReduce framework for analyzing next-generation DNA sequencing data.  
881 *Proceedings of the International Conference on Intellectual Capital, Knowledge*  
882 *Management & Organizational Learning* 20: 1297-1303.
- 883 McVean, G., 2007 The structure of linkage disequilibrium around a selective sweep. *Genetics* 175:  
884 1395-1406.
- 885 Merklung, S. H., and R. P. van Rij, 2013 Beyond RNAi: Antiviral defense strategies in *Drosophila*  
886 and mosquito. *Journal of Insect Physiology* 59: 159-170.
- 887 Messer, P. W., and D. A. Petrov, 2012 The McDonald-Kreitman Test and its Extensions under  
888 Frequent Adaptation: Problems and Solutions. *Proceedings of the National Academy of*  
889 *Sciences* 110: 8615-8620.
- 890 Messer, P. W., and D. A. Petrov, 2013 Population genomics of rapid adaptation by soft selective  
891 sweeps. *Trends in Ecology & Evolution* 28: 659-669.
- 892 Narasimhan, V., P. Danecek, A. Scally, Y. Xue, C. Tyler-Smith *et al.*, 2016 BCFtools/RoH: A  
893 hidden Markov model approach for detecting autozygosity from next-generation  
894 sequencing data. *Bioinformatics* 32: 1749-1751.
- 895 Nei, M., 1987 *Molecular evolutionary genetics*. Columbia university press.
- 896 Nei, M., and J. Miller, 1990 A Simple Method for Estimating Average Number of Nucleotide  
897 Substitutions Within and Between Populations From Restriction Data. *Genetics* 125: 873-  
898 879.
- 899 Noor, M. a. F., D. a. Garfield, S. W. Schaeffer and C. a. Machado, 2007 Divergence between the  
900 *Drosophila pseudoobscura* and *D. persimilis* genome sequences in relation to  
901 chromosomal inversions. *Genetics* 177: 1417-1428.

- 902 Palmer, W. H., J. Joosten, G. J. Overheul, P. W. Jansen, M. Vermeulen *et al.*, 2018 Induction and  
903 suppression of NF- $\kappa$ B signalling by a DNA virus of *Drosophila*.
- 904 Parmesan, C., and G. Yohe, 2003 A globally coherent fingerprint of climate change impacts across  
905 natural systems. *Nature* 421: 37-42.
- 906 Petrov, D. a., A.-S. Fiston-Lavier, M. Lipatov, K. Lenkov and J. González, 2011 Population  
907 genomics of transposable elements in *Drosophila melanogaster*. *Molecular Biology and*  
908 *Evolution* 28: 1633-1644.
- 909 Pool, J., and C. H. Langley, 2013 DPGP3.
- 910 Pool, J. E., R. B. Corbett-detig, R. P. Sugino, K. A. Stevens, C. M. Cardeno *et al.*, 2012 Population  
911 Genomics of Sub-Saharan *Drosophila melanogaster*: African Diversity and Non-African  
912 Admixture. *PLoS Genetics* 8: 1-24.
- 913 Porretta, D., V. Mastrantonio, R. Bellini, P. Somboon and S. Urbanelli, 2012 Glacial history of a  
914 modern invader: phylogeography and species distribution modelling of the Asian tiger  
915 mosquito *Aedes albopictus*. *PLoS One* 7: e44515.
- 916 Rankin, M. A., and J. C. A. Burchsted, 1992 The Cost of Migration in Insects. *Annual Review of*  
917 *Entomology* 37: 533-559.
- 918 Rastogi, S., and D. a. Liberles, 2005 Subfunctionalization of duplicated genes as a transition state  
919 to neofunctionalization. *BMC evolutionary biology* 5: 28.
- 920 Rausch, T., T. Zichner, A. Schlattl, A. M. Stutz, V. Benes *et al.*, 2012 DELLY: structural variant  
921 discovery by integrated paired-end and split-read analysis. *Bioinformatics* 28: i333-i339.
- 922 Rosenzweig, C., D. Karoly, M. Vicarelli, P. Neofotis, Q. Wu *et al.*, 2008 Attributing physical and  
923 biological impacts to anthropogenic climate change. *Nature* 453: 353-357.
- 924 Schrider, D. R., D. Houle, M. Lynch and M. W. Hahn, 2013 Rates and genomic consequences of  
925 spontaneous mutational events in *Drosophila melanogaster*. *Genetics* 194: 937-954.
- 926 Searle, J. B., P. Kotlik, R. V. Rambau, S. Markova, J. S. Herman *et al.*, 2009 The Celtic fringe of  
927 Britain: insights from small mammal phylogeography. *Proc Biol Sci* 276: 4287-4294.
- 928 Smit, A. F. A., and R. Hubley, 2008 RepeatModeler Open-1.0.
- 929 Smit, A. F. A., and R. Hubley, 2013-2015 RepeatMasker Open-4.0, pp. RepeatMasker.
- 930 Smith, F. A., J. L. Betancourt and J. H. Brown, 1995 Evolution of Body Size in the Woodrat Over  
931 the Past 25,000 Years of Climate Change. *Science* 270: 2012-2014.
- 932 Smith, N. G. C., and A. Eyre-Walker, 2002 Adaptive protein evolution in *Drosophila*. *Nature* 415:  
933 1022-1024.
- 934 Stajich, J. E., and M. W. Hahn, 2005 Disentangling the effects of demography and selection in  
935 human history. *Mol Biol Evol* 22: 63-73.
- 936 Stoletzki, N., and A. Eyre-Walker, 2011 Estimation of the neutrality index. *Molecular Biology and*  
937 *Evolution* 28: 63-70.
- 938 Subramanian, A., P. Tamayo, V. K. Mootha, S. Mukherjee, B. L. Ebert *et al.*, 2005 Gene set  
939 enrichment analysis: A knowledge-based approach for interpreting genome-wide  
940 expression profiles. *PNAS* 102: 15545-15550.
- 941 Survey, A. G., 2005 Arizona Geology. *Arizona Geology* 35: 1-6.
- 942 Tajima, F., 1989 Statistical method for testing the neutral mutation hypothesis by DNA  
943 polymorphism. *Genetics* 123: 585-595.
- 944 Takeda, K., and S. Akira, 2005 Toll-like receptors in innate immunity. *International Immunology*  
945 17: 1-14.
- 946 Unckless, R. L., 2011a A DNA Virus of *Drosophila*. *PLoS ONE* 6: e26564.

- 947 Unckless, R. L., 2011b The potential role of the X chromosome in the emergence of male-killing  
948 from mutualistic endosymbionts. *J Theor Biol* 291: 99-104.
- 949 Unckless, R. L., and J. Jaenike, 2011 Maintenance of a Male-Killing *Wolbachia* in *Drosophila*  
950 *innubila* By Male-Killing Dependent and Male-Killing Independent Mechanisms.  
951 *Evolution* 66: 678-689.
- 952 Walsh, D. B., M. P. Bolda, R. E. Goodhue, A. J. Dreves, J. Lee *et al.*, 2011 *Drosophila suzukii*  
953 (Diptera: *Drosophilidae*): Invasive Pest of Ripening Soft Fruit Expanding its Geographic  
954 Range and Damage Potential. *Journal of Integrated Pest Management* 2: 1-7.
- 955 Watanabe, T. K., O. Yamaguchi and T. Mukai, 1974 The Genetic Variability of Third  
956 Chromosomes in a Local Population of *Drosophila melanogaster*. *Genetics* 82: 63-82.
- 957 Weir, B. S., and C. C. Cockerham, 1984 Estimating F-Statistics for the Analysis of Population  
958 Structure. *Evolution* 38: 1358-1370.
- 959 White, T. A., S. E. Perkins, G. Heckel and J. B. Searle, 2013 Adaptive evolution during an ongoing  
960 range expansion: the invasive bank vole (*Myodes glareolus*) in Ireland. *Mol Ecol* 22: 2971-  
961 2985.
- 962 Wright, S. I., B. Lauga and D. Charlesworth, 2003 Subdivision and haplotype structure in natural  
963 populations of *Arabidopsis lyrata*. *Molecular Ecology* 12: 1247–1263.
- 964 Ye, K., M. H. Schulz, Q. Long, R. Apweiler and Z. Ning, 2009 Pindel : a pattern growth approach  
965 to detect break points of large deletions and medium sized insertions from paired-end short  
966 reads. *Bioinformatics* 25: 2865-2871.
- 967 Zambon, R. A., M. Nandakumar, V. N. Vakharia and L. P. Wu, 2005 The Toll pathway is  
968 important for an antiviral response in *Drosophila*. *Proceedings of the National Academy*  
969 *of Sciences* 102: 7257-7262.
- 970
